# Supplementary material for: Highly diastereoselective synthesis of 3-indolylglycines via an asymmetric oxidative heterocoupling reaction of a chiral nickel(ii) complex and indoles
Source: Royal Society of Chemistry journal article supplement (doi:10.1039/c3cc38908a), 2013-01-01
Supplement: c3cc38908a.pdf [file c3cc38908a.pdf]

# Highly diastereoselective synthesis of 3-indolyglycines via asymmetric oxidative heterocoupling reaction of chiral nickel(II) complex and indoles

Daizong Lin,<sup>a</sup> Jiang Wang,<sup>a</sup> Xu Zhang,<sup>a,b</sup> Shengbin Zhou,<sup>a</sup> Jie Lian,<sup>a,b</sup> Hualiang Jiang<sup>a</sup> and Hong Liu<sup>\*, a,b</sup>

<sup>a</sup> State Key Laboratory of Drug Research, CAS Key Laboratory of Receptor Research, Shanghai Institute of Materia Medica, Chinese Academy of Sciences, 555 Zuchongzhi Road, Shanghai 201203, P. R. China.

<sup>b</sup> Department of Medicinal Chemistry, China Pharmaceutical University, 24 Tongjiaxiang, Nanjing, P. R. China

E-mail: [hliu@mail.shcnc.ac.cn](mailto:hliu@mail.shcnc.ac.cn)

## Table of Contents

|                                                                                         |     |
|-----------------------------------------------------------------------------------------|-----|
| (A) A Proposed Mechanism.....                                                           | S2  |
| (B) Optimization of the Reaction Conditions .....                                       | S3  |
| (C) The Absolute Configuration of 3a.....                                               | S5  |
| (D) General Methods .....                                                               | S6  |
| (E) General Procedure for the Asymmetric Reactions.....                                 | S7  |
| (F) Analytical Characterization Data of Products.....                                   | S9  |
| (G) Copies of <sup>1</sup> H NMR and <sup>13</sup> C NMR Spectra for the Products ..... | S27 |
| (H) Reference.....                                                                      | S42 |

## (A) A Proposed Mechanism

We proposed a mechanism of this oxidative coupling reaction (Scheme S1). Under the basic condition, the nickel complex enolate and an indole anion initially coordinate to the copper(II) center, giving the chelated intermediate **TS-1**, the chelate **TS-1** can undergo single-electron transfer to form the chelated nickel(II) complex radical **TS-2**. Due to its proximity to the indole anion, the radical is attacked by this nucleophilic species, resulting in radical anion **TS-3**. This intermediate **TS-3** can then be further oxidized by the proximal copper(I) to generate the product **3a** and copper(0).

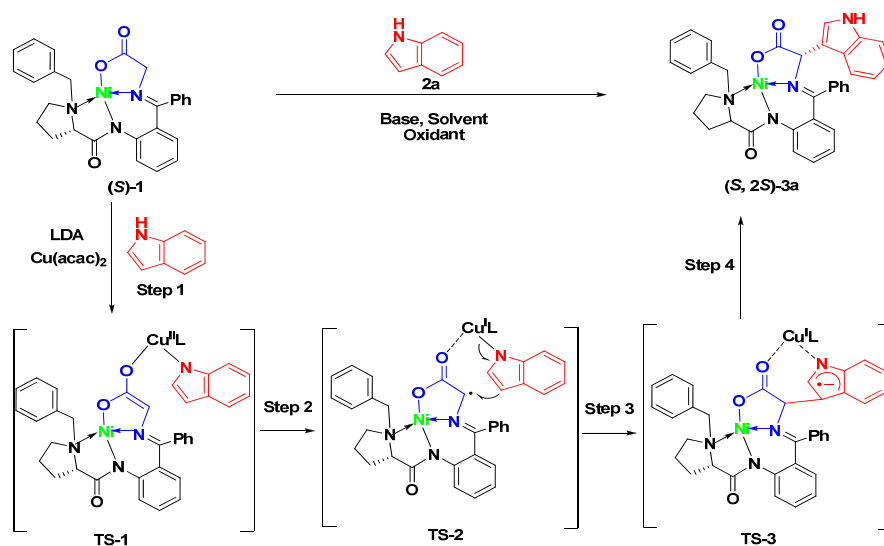

Scheme S1

## (B) Optimization of the Reaction Conditions

Copper(II) were considered to be good oxidants for this reaction (in Table 1, entry). We also explored copper(II) oxidants listed in Table S1, CuCl<sub>2</sub> and CuSO<sub>4</sub> afforded the target product in very low yield due to the poor conversion (entries 1 and 2). A higher yield and diastereoselectivity was observed with Cu(acac)<sub>2</sub> as the oxidant than with Cu(OMs)<sub>2</sub>, Cu(OAc)<sub>2</sub>, Cu(OTf)<sub>2</sub>.

**Table S1 Optimization of the Oxidants**

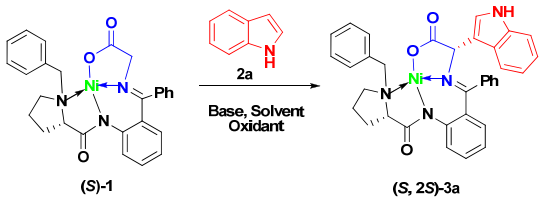

| Entry | Base | Solution | Oxidant               | Temp/ <sup>o</sup> C | Yield (%) | de <sup>b</sup> (%) |
|-------|------|----------|-----------------------|----------------------|-----------|---------------------|
| 1     | LDA  | THF      | CuCl <sub>2</sub>     | -40                  | 15        | ND                  |
| 2     | LDA  | THF      | CuSO <sub>4</sub>     | -40                  | trace     | ND                  |
| 3     | LDA  | THF      | Cu(OMs) <sub>2</sub>  | -40                  | 30        | ND <sup>c</sup>     |
| 4     | LDA  | THF      | Cu(acac) <sub>2</sub> | -40                  | 59        | >99                 |
| 5     | LDA  | THF      | Cu(OTf) <sub>2</sub>  | -40                  | 48        | 98                  |
| 6     | LDA  | THF      | Cu(OAc) <sub>2</sub>  | -40                  | 42        | 98                  |

The equivalents of the base, oxidant and indole were also optimized, which were listed in Table S2. The reactions were run under with 0.20 mmol of (*S*)-**1** and **2a** in 10 mL of THF with LDA for 0.5 h, then added Cu(acac)<sub>2</sub> for 1 h at -40°C. 3.3 and 3.5 equiv. of LDA yields the best product (entries 3 and 6). Decreasing LDA would lower the yield due to the poor conversion(entries 1-2), and increasing the base would also lower the chemical yield due to the side reactions(entries 4-5), 1.5 equiv. of Cu(acac)<sub>2</sub> demonstrated the best performance among the screening the equiv. of the oxidant (entries 6-8). The yields enhanced when the equiv. of indole increased (entries 9-11). From the viewpoint of practical applications, we chose 3.3 equiv. of LDA, 1.5 equiv. of Cu(acac)<sub>2</sub>, and 4 equiv. of indole to carry out the reaction.

**Table S2 Optimization of the equivalents of base, oxidant, and indole**

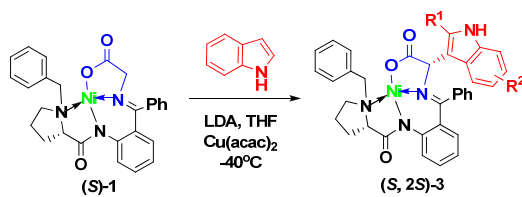

| Entry | Equiv. of LDA | Equiv. of Cu(acac) <sub>2</sub> | Equiv. of indole | Yield (%) |
|-------|---------------|---------------------------------|------------------|-----------|
| 1     | 2             | 1.2                             | 2                | 12        |
| 2     | 3             | 1.2                             | 2                | 34        |
| 3     | 3.5           | 1.2                             | 2                | 38        |
| 4     | 4             | 1.2                             | 2                | 22        |
| 5     | 5             | 1.2                             | 2                | trace     |
| 6     | 3.3           | 1.2                             | 2                | 38        |
| 7     | 3.3           | 1.5                             | 2                | 42        |
| 8     | 3.3           | 2                               | 2                | 35        |
| 9     | 3.3           | 1.5                             | 3                | 47        |
| 10    | 3.3           | 1.5                             | 4                | 59        |
| 11    | 3.3           | 1.5                             | 5                | 60        |

## (C) The Absolute Configuration of **3a** and Quantum Chemical Calculation

X-ray Single Crystal Structure Analysis of (*S*, 2*S*)-**3a**:

X-ray crystallographic data of (*S*, 2*S*)-**3a** were solutions at  $T = 293(2)$  K:

$C_{35}H_{30}N_4NiO_3$ ,  $M_r = 613.34$ , monoclinic. Space group  $P2(1)$ ,  $a = 11.435(5)$  Å,  $b = 9.023(4)$  Å,  $c = 15.152(7)$  Å,  $\alpha = 90^\circ$ ,  $\beta = 99.011(10)^\circ$ ,  $\gamma = 90^\circ$ ,  $V = 1544.2(13)$  Å<sup>3</sup>,  $Z = 2$ .

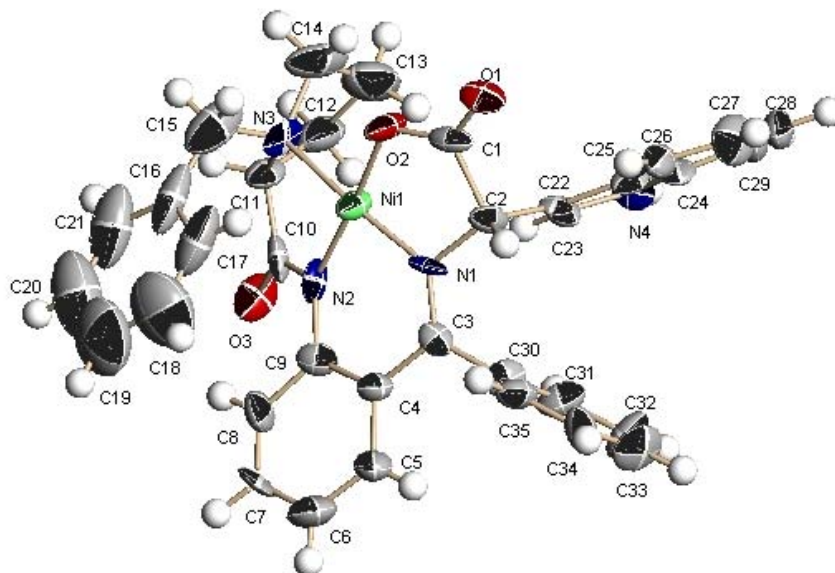

**Figure S1.** The crystal structure of (*S*, 2*S*)-**3a** by X-ray analysis.

These data can be obtained free of charge from the Cambridge Crystallographic Data

Centre via [www.ccdc.cam.ac.uk/data\\_request/cif](http://www.ccdc.cam.ac.uk/data_request/cif), the CCDC number is 909566.

## (D) General Methods

The reagents (chemicals) were purchased from commercial sources, and used without further purification. Analytical thin layer chromatography (TLC) was HSGF 254 (0.15-0.2 mm thickness). All products were characterized by their NMR and MS spectra.  $^1\text{H}$  and  $^{13}\text{C}$  NMR spectra were recorded in deuteriochloroform ( $\text{CDCl}_3$ ) on a 300 MHz or 400 MHz instrument. Chemical shifts were reported in parts per million (ppm,  $\delta$ ) downfield from tetramethylsilane. Proton coupling patterns are described as singlet (s), doublet (d), triplet (t), quartet (q), multiplet (m), and broad (br). Low- and high-resolution mass spectra (LRMS and HRMS) were measured on spectrometer. Optical rotations were reported as follows:  $[\alpha]_{\text{D}}^{20}$  (c: g/100 mL, in solvent).

## (E) General Procedure for the Asymmetric Reactions

**General Procedure for the Synthesis of (*S*, 2*S*)-3a.** The nickel(II) complex of glycine (*S*)-1 (100 mg, 0.201 mmol) and indole (94 mg, 0.803 mmol) was dissolved in tetrahydrofuran (10 mL), and stirred at -40°C under nitrogen. LDA (0.33 mL, 2M, 0.662 mmol) were added and the reaction mixture was stirred for 30 min. Then, the Cu(acac)<sub>2</sub> (78.8 mg, 0.301 mmol) was added at -40°C. The reaction was moved out of the cool bath, and allowed to warm to room temperature naturally and to stir for 1 h. The reaction was quenched by pouring the crude reaction mixture over 30 mL of aq. sat. NH<sub>4</sub>Cl. The suspension was extracted with ethyl acetate (3 times). The combined organic layers were dried with MgSO<sub>4</sub>, concentrated, and purified by column chromatography on silica gel (petroleum ether/ethyl acetate = 1/1) to give (*S*,2*S*)-3a as a red solid.

**Procedure for the Synthesis of (2*S*,3*R*)-4a:** The crystallized complex (*S*, 2*S*)-3a (1 g, 1.64 mmol) was dissolved in THF/MeOH (1:1, v/v) 50 mL, and aqueous 1 N HCl (2 mL) was added. The reaction mixture was stirred for 6 h at room temperature, until the red color of the solution disappeared. The reaction was evaporated to dryness. Water (20 mL) was added to the residue to form a clear solution, and this solution was then separated by column chromatography on C<sub>18</sub>-reversed phase (230-400 mesh) silica gel. Pure water as an eluent was employed to remove the green NiCl<sub>2</sub> and excess HCl; water was then used to obtain optically pure product (*S*)-4a (288 mg,

93%). The ligand BPB that decomposed from (*S*, 2*S*)-**3a** was recovered by MeOH eluent (608 mg, 97%), and the column chromatography was washed with 100 mL of MeOH for further use.



## (F) Analytical Characterization Data of Products

### Nickel(II)-(S)-BPB/(S)-2-amino-2-(1H-indol-3-yl)acetic acid Schiff Base Complex

#### 3a.

Obtained as a red solid by flash column chromatography (petroleum ether/ethyl acetate = 1/1), yield 63%. Mp > 280 °C;  $[\alpha]_D^{20} = +2440$  (c = 0.10 g/100 mL, CHCl<sub>3</sub>).  
<sup>1</sup>H NMR (CDCl<sub>3</sub>, 400 MHz)  $\delta$  11.12 (s, 1H), 8.42 (d, *J* = 7.6 Hz, 2H), 8.02-7.96 (m, 2H), 7.56-7.54(m, 3H), 7.43-7.39 (m, 2H), 7.35-7.31 (m, 2H), 7.21-7.17(m, 1H), 7.12-7.03 (m, 2H), 6.95-6.89 (m, 2H), 6.64 (t, *J* = 7.6 Hz, 1H), 6.51 (d, *J* = 8.0 Hz, 1H), 6.16 (d, *J* = 8.0 Hz, 1H), 4.91 (s, 1H), 4.14 (d, *J* = 12.4 Hz, 1H), 3.63-3.57 (m, 2H), 3.32-3.23 (m, 2H), 2.57-2.50 (m, 2H), 2.16-2.08 (m, 2H) ppm. <sup>13</sup>C NMR (CDCl<sub>3</sub>, 100 MHz)  $\delta$  180.9, 177.1, 171.1, 143.1, 136.4, 135.2, 134.2, 133.0, 132.0, 131.7, 129.5, 129.0, 128.9, 128.8, 127.2, 124.0, 123.4, 121.8, 120.6, 119.7, 119.0, 113.0, 112.1, 70.2, 69.0, 63.3, 57.9, 30.8, 23.8 ppm. LRMS (ESI) [M+H]<sup>+</sup> found m/z 613. HRMS (ESI) [M+Na]<sup>+</sup> found m/z 635.1559, calcd for C<sub>35</sub>H<sub>30</sub>N<sub>4</sub>NiO<sub>3</sub>Na 635.1569. HPLC (Chiralpak IA, *n*-hexane/*i*-propanol = 60/40, flow rate 1.0 mL/min,  $\lambda$  = 220 nm),  $t_{\text{major}} = 16.22$  min, de > 99%.

### Nickel(II)-(S)-BPB/(S)-2-amino-2-(5-methoxy-1H-indol-3-yl)acetic acid Schiff

#### Base Complex 3b.

Obtained as a red solid by flash column chromatography (petroleum ether/ethyl acetate = 1/1), yield 60%. Mp >280 °C;  $[\alpha]_D^{20} = +1773$  (c = 0.11 g/100 mL, CHCl<sub>3</sub>).

$^1\text{H}$  NMR ( $\text{CDCl}_3$ , 300 MHz)  $\delta$  10.97 (s, 1H), 8.41 (d,  $J = 7.5$  Hz, 2H), 8.05 (d,  $J = 8.1$  Hz, 1H), 7.69 (d,  $J = 2.1$  Hz, 1H), 7.55 (d,  $J = 4.2$  Hz, 2H), 7.41 (t,  $J = 7.5$  Hz, 2H), 7.35-7.32 (m, 1H), 7.30-7.07 (m, 4H), 6.91 (t,  $J = 7.8$  Hz, 1H), 6.73-6.62 (m, 2H), 6.52 (dd,  $J = 8.4, 1.5$  Hz, 1H), 6.17 (d,  $J = 7.5$  Hz, 1H), 4.86 (s, 1H), 4.14 (d,  $J = 12.0$  Hz, 1H), 3.61-3.57 (m, 5H), 3.29-3.22 (m, 2H), 2.56-2.53 (m, 2H), 2.17-2.04 (m, 2H), 8.34 (d,  $J = 8.7$  Hz, 1H), 8.03 (d,  $J = 7.5$  Hz, 2H), 7.90 (s, 1H), 7.65 (s, 1H), 7.54-7.52 (m, 2H), 7.45-7.31 (m, 5H), 7.19-7.07 (m, 5H), 6.97-6.95 (m, 1H), 6.81-6.66 (m, 5H), 4.76 (d,  $J = 2.1$  Hz, 1H), 4.41 (d,  $J = 1.8$  Hz, 1H), 4.25 (d,  $J = 12.3$  Hz, 1H), 3.44-3.29 (m, 2H), 2.82-2.73 (m, 1H), 2.38-2.24 (m, 5H), 2.04-1.98 (m, 1H) ppm.  $^{13}\text{C}$  NMR ( $\text{CDCl}_3$ , 125 MHz)  $\delta$  181.0, 177.1, 171.0, 153.4, 143.1, 135.2, 134.2, 133.0, 132.1, 131.8, 131.6, 129.0, 128.9, 128.8, 127.2, 124.0, 123.9, 120.6, 112.8, 112.6, 111.6, 101.8, 70.1, 69.0, 63.2, 57.9, 55.8, 30.8, 23.9 ppm. LRMS (ESI)  $[\text{M}+\text{H}]^+$  found  $m/z$  643. HRMS (ESI)  $[\text{M}+\text{Na}]^+$  found  $m/z$  665.1656, calcd for  $\text{C}_{36}\text{H}_{32}\text{N}_4\text{NiO}_4\text{Na}$  665.1675. HPLC (Chiralpak IA, *n*-hexane/*i*-propanol = 60/40, flow rate 1.0 mL/min,  $\lambda = 220$  nm),  $t_{\text{major}} = 15.58$  min, de > 99%.

**Nickel(II)-(S)-BPB/(S)-2-amino-2-(5-fluoro-1H-indol-3-yl)acetic acid Schiff Base  
Complex 3c.**

Obtained as a red solid by flash column chromatography (petroleum ether/ethyl acetate = 1/1), yield 40%. Mp >280 °C;  $[\alpha]_{\text{D}}^{20} = +2210$  (c = 0.10 g/100 mL,  $\text{CHCl}_3$ ).

$^1\text{H}$  NMR ( $\text{CDCl}_3$ , 300 MHz)  $\delta$  11.22 (s, 1H), 8.43 (d,  $J = 7.5$  Hz, 2H), 8.03 (d,  $J = 8.7$  Hz, 1H), 7.66-7.55 (m, 4H), 7.45-7.31 (m, 4H), 7.23-7.09 (m, 2H), 6.97-6.89 (m, 2H),

6.66 (t,  $J = 7.5$  Hz, 1H), 6.53 (d,  $J = 8.1$  Hz, 1H), 6.18 (d,  $J = 7.5$  Hz, 1H), 4.90 (s, 1H), 4.16 (d,  $J = 12.3$  Hz, 1H), 3.64-3.59 (m, 2H), 3.31-3.24 (m, 2H), 2.60-2.56 (m, 2H), 2.20-2.07 (m, 2H) ppm.  $^{13}\text{C}$  NMR ( $\text{CDCl}_3$ , 125 MHz)  $\delta^{13}\text{C}$  NMR (126 MHz, DMSO)  $\delta$  180.9, 177.0, 171.3, 157.0 (d,  $J = 230.1$  Hz), 143.1, 135.2, 134.2, 133.1, 132.0, 131.8, 129.5, 129.0, 128.9, 128.3, 127.2, 126.2, 125.5, 124.0, 120.6, 113.1 (d,  $J = 8.0$  Hz), 110.0 (d,  $J = 25.5$  Hz), 104.2 (d,  $J = 23.8$  Hz), 70.2, 68.7, 63.3, 57.8, 30.7, 23.8. ppm. LRMS (ESI)  $[\text{M}+\text{H}]^+$  found  $m/z$  631. HRMS (ESI)  $[\text{M}+\text{Na}]^+$  found  $m/z$  653.1498, calcd for  $\text{C}_{35}\text{H}_{29}\text{N}_4\text{NiO}_3\text{NaF}$  653.1475. HPLC (Chiralpak IA, *n*-hexane/*i*-propanol = 60/40, flow rate 1.0 mL/min,  $\lambda = 220$  nm),  $t_{\text{major}} = 13.97$  min, de > 99%.

**Nickel(II)-(S)-BPB/(S)-2-amino-2-(5-chloro-1H-indol-3-yl)acetic acid Schiff Base Complex 3d.**

Obtained as a red solid by flash column chromatography (petroleum ether/ethyl acetate = 1/1), yield 35%. Mp >280 °C;  $[\alpha]_{\text{D}}^{20} = +1764$  (c = 0.11 g/100 mL,  $\text{CHCl}_3$ ).  $^1\text{H}$  NMR ( $\text{CDCl}_3$ , 300 MHz)  $\delta$  11.30 (s, 1H), 8.43 (d,  $J = 7.8$  Hz, 2H), 8.02 (d,  $J = 12.3$  Hz, 2H), 7.59-7.51 (m, 3H), 7.45-7.36 (m, 4H), 7.23-7.05 (m, 3H), 6.94 (t,  $J = 7.8$  Hz, 1H), 6.65 (t,  $J = 7.5$  Hz, 1H), 6.52 (d,  $J = 8.4$  Hz, 1H), 6.16 (d,  $J = 8.1$  Hz, 1H), 4.91 (s, 1H), 4.16 (d,  $J = 12.9$  Hz, 1H), 3.65-3.59 (m, 2H), 3.30-3.27 (m, 2H), 2.68-2.57 (m, 2H), 2.20-2.14 (m, 2H) ppm.  $^{13}\text{C}$  NMR ( $\text{CDCl}_3$ , 125 MHz)  $\delta$  180.5, 176.5, 170.9, 142.6, 134.7, 134.4, 133.8, 132.6, 131.6, 131.3, 129.0, 128.6, 128.4, 127.9, 126.8, 126.7, 125.9, 125.6, 125.0, 123.5, 123.3, 121.3, 118.2, 113.2, 112.1,

69.6, 68.0, 62.8, 57.4, 30.3, 23.4 ppm. LRMS (ESI)  $[M+H]^+$  found  $m/z$  647. HRMS (ESI)  $[M+Na]^+$  found  $m/z$  669.1160, calcd for  $C_{35}H_{29}N_4NiO_3NaCl$  669.1179. HPLC (Chiralpak IA, *n*-hexane/*i*-propanol = 60/40, flow rate 1.0 mL/min,  $\lambda$  = 220 nm),  $t_{major}$  = 13.03 min, de > 99%.

**Nickel(II)-(S)-BPB/(S)-2-amino-2-(5-bromo-1H-indol-3-yl)acetic acid Schiff Base Complex 3e.**

Obtained as a red solid by flash column chromatography (petroleum ether/ethyl acetate = 1/1), yield 33%. Mp 180-182 °C;  $[\alpha]_D^{20} = +1790$  (c = 0.10 g/100 mL,  $CHCl_3$ ).  $^1H$  NMR ( $CDCl_3$ , 300 MHz)  $\delta$  11.31 (s, 1H), 8.43 (d,  $J = 7.2$  Hz, 2H), 8.10 (s, 1H), 8.03 (d,  $J = 7.8$  Hz, 1H), 7.59-7.55 (m, 2H), 7.51 (s, 1H), 7.45-7.31 (m, 4H), 7.23-7.16 (m, 2H), 7.11 (t,  $J = 7.8$  Hz, 1H), 6.94 (t,  $J = 7.5$  Hz, 1H), 6.65 (t,  $J = 7.8$  Hz, 1H), 6.52 (d,  $J = 8.4$  Hz, 1H), 6.15 (d,  $J = 7.5$  Hz, 1H), 4.91 (s, 1H), 4.16 (d,  $J = 12.3$  Hz, 1H), 3.65-3.59 (m, 2H), 3.18-3.13 (m, 2H), 2.65-2.59 (m, 2H), 2.20-2.09 (m, 2H) ppm.  $^{13}C$  NMR ( $CDCl_3$ , 125 MHz)  $\delta$  181.0, 177.0, 171.4, 143.1, 135.2, 135.1, 134.3, 133.1, 132.1, 131.8, 129.5, 129.1, 128.9, 128.4, 127.3, 127.2, 127.1, 126.1, 125.3, 124.3, 124.0, 121.7, 120.6, 114.2, 112.5, 111.8, 70.1, 68.5, 63.3, 57.9, 30.8, 24.0 ppm. LRMS (EI)  $[M]^+$  found  $m/z$  690. HRMS (EI)  $[M]^+$  found  $m/z$  690.0721, calcd for  $C_{35}H_{29}N_4NiO_3Br$  690.0777. HPLC (Chiralpak IA, *n*-hexane/ *i*-propanol 60/40, flow rate 1.0 mL/min,  $\lambda$  = 220 nm),  $t_{major}$  = 14.03 min, de > 99%.

**Nickel(II)-(S)-BPB/(S)-2-amino-2-(4-methyl-1H-indol-3-yl)acetic acid Schiff Base**

### **Complex 3g.**

Obtained as a red solid by flash column chromatography (petroleum ether/ethyl acetate = 1/1), yield 62%. Mp 242-244 °C;  $[\alpha]_D^{20} = +1250$  (c = 0.10 g/100 mL, CHCl<sub>3</sub>). <sup>1</sup>H NMR (CDCl<sub>3</sub>, 300 MHz)  $\delta$  11.25 (s, 1H), 8.84 (s, 1H), 8.43 (d, *J* = 7.8 Hz, 2H), 8.09 (d, *J* = 8.7 Hz, 1H), 7.62-7.51 (m, 2H), 7.43 (t, *J* = 7.2 Hz, 2H), 7.32 (t, *J* = 7.5 Hz, 1H), 7.23-7.10 (m, 3H), 6.90-6.77 (m, 2H), 6.66 (t, *J* = 7.5 Hz, 1H), 6.57-6.50 (m, 2H), 6.09 (d, *J* = 7.5 Hz, 1H), 5.13 (s, 1H), 4.16 (d, *J* = 12.0 Hz, 1H), 3.67-3.59 (m, 2H), 3.49-3.37 (m, 2H), 2.65-2.57 (m, 2H), 2.21-2.14 (m, 2H), 1.99 (s, 3H) ppm. <sup>13</sup>C NMR (CDCl<sub>3</sub>, 125 MHz)  $\delta$  181.1, 177.4, 171.1, 143.1, 136.1, 135.3, 134.6, 133.0, 132.0, 131.8, 130.3, 129.4, 129.1, 128.9, 128.5, 127.1, 126.7, 125.9, 124.2, 124.0, 122.4, 121.7, 120.7, 120.6, 115.9, 109.9, 70.3, 68.6, 63.2, 57.9, 30.8, 24.0, 19.5 ppm. LRMS (ESI) [M+H]<sup>+</sup> found *m/z* 627. HRMS (ESI) [M+Na]<sup>+</sup> found *m/z* 627.1756, calcd for C<sub>36</sub>H<sub>32</sub>N<sub>4</sub>NiO<sub>3</sub>Na 649.1726. HPLC (Chiralpak AD, *n*-hexane/*i*-propanol = 75/25, flow rate 1.0 mL/min,  $\lambda$  = 220 nm), *t*<sub>major</sub> = 13.73 min, de > 99 %.

### **Nickel(II)-(S)-BPB/(S)-2-amino-2-(5-methyl-1H-indol-3-yl)acetic acid Schiff Base**

#### **Complex 3h.**

Obtained as a red solid by flash column chromatography (petroleum ether/ethyl acetate = 1/1), yield 56%. Mp 232-234 °C;  $[\alpha]_D^{20} = +1600$  (c = 0.10 g/100 mL, CHCl<sub>3</sub>). <sup>1</sup>H NMR (CDCl<sub>3</sub>, 400 MHz)  $\delta$  10.96 (s, 1H), 8.43 (d, *J* = 8.1 Hz, 2H), 8.03 (d, *J* = 9.0 Hz, 1H), 7.70 (s, 1H), 7.59-7.55 (m, 2H), 7.43-7.33 (m, 4H), 7.25-7.17 (m, 2H), 7.14-7.08 (m, 1H), 6.98-6.88 (m, 2H), 6.65 (t, *J* = 7.5 Hz, 1H), 6.52 (d, *J* = 8.4

Hz, 1H), 6.15 (d,  $J = 7.8$  Hz, 1H), 4.89 (s, 1H), 4.17 (d,  $J = 12.0$  Hz, 1H), 3.65-3.60 (m, 2H), 3.26-3.17 (m, 2H), 2.60-2.57 (m, 2H), 2.32 (s, 3H), 2.20-2.09 (m, 2H) ppm.  $^{13}\text{C}$  NMR ( $\text{CDCl}_3$ , 125 MHz)  $\delta$  180.9, 177.1, 171.0, 143.0, 135.2, 134.8, 134.3, 133.0, 132.1, 131.7, 129.4, 129.0, 128.9, 128.4, 127.4, 127.3, 127.2, 126.2, 125.6, 123.9, 123.6, 123.4, 120.5, 119.2, 112.3, 111.7, 70.1, 69.0, 63.3, 57.8, 30.8, 23.9, 21.7 ppm. LRMS (ESI)  $[\text{M}+\text{H}]^+$  found  $m/z$  627. HRMS (ESI)  $[\text{M}+\text{H}]^+$  found  $m/z$  627.1890, calcd for  $\text{C}_{36}\text{H}_{33}\text{N}_4\text{NiO}_3$  627.1906. HPLC (Chiralpak IA, *n*-hexane/*i*-propanol = 60/40, flow rate 1.0 mL/min,  $\lambda = 220$  nm),  $t_{\text{major}} = 15.62$  min, de > 99 %.

### **Nickel(II)-(S)-BPB/(S)-2-amino-2-(6-methyl-1H-indol-3-yl)acetic acid Schiff Base**

#### **Complex 3i.**

Obtained as a red solid by flash column chromatography (petroleum ether/ethyl acetate = 1/1), yield 60 %. Mp 238-240°C;  $[\alpha]_{\text{D}}^{20} = +2206$  (c = 0.16 g/100 mL,  $\text{CHCl}_3$ ).  $^1\text{H}$  NMR ( $\text{CDCl}_3$ , 300 MHz)  $\delta$  10.93 (s, 1H), 8.42 (d,  $J = 6.9$  Hz, 2H), 8.03 (d,  $J = 9.0$  Hz, 1H), 7.95 (d,  $J = 8.4$  Hz, 1H), 7.56-7.54 (m, 2H), 7.45-7.31 (m, 4H), 7.20 (t,  $J = 7.5$  Hz, 1H), 7.14-7.08 (m, 2H), 6.96 (t,  $J = 7.5$  Hz, 1H), 6.79 (d,  $J = 9.3$  Hz, 1H), 6.65 (t,  $J = 6.6$  Hz, 1H), 6.52 (d,  $J = 8.4$  Hz, 1H), 6.16 (d,  $J = 8.4$  Hz, 1H), 4.87 (s, 1H), 4.15 (d,  $J = 12.6$  Hz, 1H), 3.64-3.59 (m, 2H), 3.28-3.23 (m, 2H), 2.60-2.57 (m, 2H), 2.36 (s, 3H), 2.18-2.10 (m, 2H) ppm.  $^{13}\text{C}$  NMR ( $\text{CDCl}_3$ , 125 MHz)  $\delta$  180.9, 177.0, 171.0, 143.1, 136.9, 135.2, 134.2, 133.0, 132.1, 131.7, 130.8, 129.5, 129.0, 128.9, 128.8, 128.4, 127.2, 126.2, 124.0, 123.3, 122.8, 120.8, 120.6, 119.5, 112.8, 111.8, 70.2, 69.2, 63.3, 57.8, 30.8, 23.8, 21.8 ppm. LRMS (ESI)  $[\text{M}+\text{H}]^+$  found

$m/z$  627. HRMS (ESI)  $[M+Na]^+$  found  $m/z$  649.1744, calcd for  $C_{36}H_{32}N_4NiO_3Na$  649.1726. HPLC (Chiralpak IA, *n*-hexane/*i*-propanol = 60/40, flow rate 1.0 mL/min,  $\lambda = 220$  nm),  $t_{major} = 16.20$  min, de > 99 %.

**Nickel(II)-(S)-BPB/(S)-2-amino-2-(7-methyl-1H-indol-3-yl)acetic acid Schiff Base  
Complex 3j.**

Obtained as a red solid by flash column chromatography (petroleum ether/ethyl acetate = 1/1), yield 54%. Mp 229-231 °C;  $[\alpha]_D^{20} = +1890$  (c = 0.15 g/100 mL,  $CHCl_3$ ).  $^1H$  NMR ( $CDCl_3$ , 300 MHz)  $\delta$  11.11 (s, 1H), 8.43 (d,  $J = 7.2$  Hz, 2H), 8.04 (d,  $J = 8.7$  Hz, 1H), 7.89-7.85 (m, 1H), 7.58-7.52 (m, 3H), 7.42 (t,  $J = 7.5$  Hz, 2H), 7.35-7.33 (m, 1H), 7.23-7.17 (m, 1H), 7.14-7.09 (m, 1H), 6.97 (t,  $J = 7.5$  Hz, 1H), 6.88-6.86 (m, 2H), 6.70-6.63 (m, 1H), 6.53 (d,  $J = 9.6$  Hz, 1H), 6.19 (d,  $J = 7.2$  Hz, 1H), 4.90 (s, 1H), 4.15 (d,  $J = 12.0$  Hz, 1H), 3.64-3.59 (m, 4H), 2.61-2.57 (m, 2H), 2.45 (s, 3H), 2.19-2.13 (m, 2H) ppm.  $^{13}C$  NMR ( $CDCl_3$ , 125 MHz)  $\delta$  181.0, 177.3, 171.2, 142.9, 136.0, 135.3, 134.1, 133.0, 132.6, 132.0, 131.8, 129.6, 129.2, 129.1, 128.9, 128.4, 127.1, 126.2, 125.0, 124.0, 122.4, 121.1, 120.7, 119.3, 117.4, 113.3, 70.4, 69.1, 63.4, 57.9, 30.8, 23.8, 17.2 ppm. LRMS (ESI)  $[M+H]^+$  found  $m/z$  627. HRMS (ESI)  $[M+Na]^+$  found  $m/z$  649.1734, calcd for  $C_{36}H_{32}N_4NiO_3Na$  649.1726. HPLC (Chiralpak IA, *n*-hexane/*i*-propanol = 60/40, flow rate 1.0 mL/min,  $\lambda = 220$  nm),  $t_{minor} = 6.75$  min,  $t_{major} = 16.32$  min, de = 98 %.

**Nickel(II)-(S)-BPB/(S)-2-amino-2-(2-methyl-1H-indol-3-yl)acetic acid Schiff Base**

### Complex 3k.

Obtained as a red solid by flash column chromatography (petroleum ether/ethyl acetate = 1/1), yield 65%. Mp 186-188 °C;  $[\alpha]_D^{20} = +1340$  (c = 0.10 g/100 mL, CHCl<sub>3</sub>). <sup>1</sup>H NMR (CDCl<sub>3</sub>, 300 MHz)  $\delta$  10.81 (s, 1H), 10.09 (d, *J* = 8.1 Hz, 1H), 8.46 (d, *J* = 7.5 Hz, 2H), 8.15 (d, *J* = 8.4 Hz, 1H), 7.56-7.54 (m, 2H), 7.44 (t, *J* = 7.5 Hz, 2H), 7.39-7.34 (m, 1H), 7.30-7.03 (m, 5H), 6.96 (t, *J* = 7.8 Hz, 1H), 6.59 (t, *J* = 7.8 Hz, 1H), 6.40 (d, *J* = 7.2 Hz, 1H), 5.64 (d, *J* = 7.2 Hz, 1H), 4.98 (s, 1H), 4.20 (d, *J* = 12.3 Hz, 1H), 3.73-3.63 (m, 2H), 3.27-3.22 (m, 2H), 2.66-2.61 (m, 2H), 2.22-2.07 (m, 2H), 1.65 (s, 3H) ppm. <sup>13</sup>C NMR (CDCl<sub>3</sub>, 125 MHz)  $\delta$  181.0, 178.1, 171.8, 143.0, 135.5, 135.3, 134.9, 134.6, 133.0, 132.1, 131.8, 129.3, 129.1, 129.0, 128.9, 128.1, 126.7, 126.5, 126.1, 125.9, 123.9, 120.7, 120.5, 119.4, 118.8, 111.5, 107.7, 70.4, 68.7, 63.8, 57.7, 30.8, 23.4, 11.2 ppm. LRMS (ESI) [M+H]<sup>+</sup> found *m/z* 627. HRMS (ESI) [M+Na]<sup>+</sup> found *m/z* 649.1724, calcd for C<sub>36</sub>H<sub>32</sub>N<sub>4</sub>NiO<sub>3</sub>Na 649.1726. HPLC (Chiralpak IA, *n*-hexane/*i*-propanol = 60/40, flow rate 1.0 mL/min,  $\lambda$  = 220 nm), *t*<sub>minor</sub> = 6.85 min, *t*<sub>major</sub> = 15.53 min, de = 98 %.

### Nickel(II)-(S)-BPB/(S)-2-amino-2-(2-(ethoxycarbonyl)-1H-indol-3-yl)acetic acid

#### Schiff Base Complex 3l.

Obtained as a red solid by flash column chromatography (petroleum ether/ethyl acetate = 1/1), yield 55%. Mp 172-174 °C;  $[\alpha]_D^{20} = +1168$  (c = 0.19 g/100 mL, CHCl<sub>3</sub>). <sup>1</sup>H NMR (CDCl<sub>3</sub>, 300 MHz)  $\delta$  11.54 (s, 1H), 10.47 (s, 1H), 8.48 (d, *J* = 7.5 Hz, 2H), 8.13 (d, *J* = 8.7 Hz, 1H), 7.48-7.42 (m, 5H), 7.34-7.20 (m, 4H), 7.14-7.08 (m,



1H), 6.81 (t,  $J = 7.8$  Hz, 1H), 6.59 (t,  $J = 7.8$  Hz, 1H), 6.40 (d,  $J = 8.1$  Hz, 1H), 6.07 (s, 1H), 5.49 (d,  $J = 7.8$  Hz, 1H), 4.24 (d,  $J = 12.3$  Hz, 1H), 4.19-3.99 (m, 2H), 3.73 (d,  $J = 12.3$  Hz, 1H), 3.66 (t,  $J = 8.7$  Hz, 1H), 3.26-3.15 (m, 2H), 2.68-2.59 (m, 2H), 2.26-2.08 (m, 2H), 1.29 (t,  $J = 7.2$  Hz, 3H) ppm.  $^{13}\text{C}$  NMR ( $\text{CDCl}_3$ , 125 MHz)  $\delta$  181.0, 176.7, 172.5, 160.6, 143.1, 136.4, 135.2, 135.1, 133.1, 132.2, 131.9, 129.1, 129.0, 128.9, 127.5, 126.9, 126.0, 125.9, 125.2, 124.7, 124.0, 122.2, 120.6, 120.3, 118.2, 113.7, 70.3, 67.5, 63.7, 60.5, 57.7, 30.8, 23.5, 14.6 ppm. LRMS (ESI)  $[\text{M}+\text{H}]^+$  found  $m/z$  685. HRMS (ESI)  $[\text{M}+\text{H}]^+$  found  $m/z$  685.1972, calcd for  $\text{C}_{38}\text{H}_{35}\text{N}_4\text{NiO}_5$  685.1961. HPLC (Chiralpak IA, *n*-hexane/*i*-propanol = 60/40, flow rate 1.0 mL/min,  $\lambda = 220$  nm),  $t_{\text{minor}} = 10.63$  min,  $t_{\text{major}} = 21.82$  min, de = 96 %.

**Nickel(II)-(S)-BPB/(S)-2-amino-2-(2-phenyl-1H-indol-3-yl)acetic acid Schiff Base  
Complex 3m.**

Obtained as a red solid by flash column chromatography (petroleum ether/ethyl acetate = 1/1), yield 74 %. Mp 222-224 °C;  $[\alpha]_{\text{D}}^{20} = +2080$  (c = 0.10 g/100 mL,  $\text{CHCl}_3$ ).  $^1\text{H}$  NMR ( $\text{CDCl}_3$ , 300 MHz)  $\delta$  11.23 (s, 1H), 10.98 (d,  $J = 8.1$  Hz, 1H), 8.52 (d,  $J = 7.2$  Hz, 2H), 8.13-8.08 (m, 1H), 7.56-7.53 (m, 2H), 7.45-7.40 (m, 3H), 7.32-7.30 (m, 4H), 7.23-7.14 (m, 2H), 7.08-7.03 (m, 2H), 6.97-6.88 (m, 2H), 6.74 (t,  $J = 6.0$  Hz, 1H), 6.54-6.47 (m, 1H), 6.19 (d,  $J = 7.5$  Hz, 1H), 5.50-5.42 (m, 1H), 5.30 (s, 1H), 4.25 (d,  $J = 12.3$  Hz, 1H), 3.76-3.67 (m, 2H), 3.53-3.45 (m, 1H), 3.27-3.20 (m, 1H), 2.73-2.64 (m, 2H), 2.31-2.16 (m, 2H) ppm.  $^{13}\text{C}$  NMR ( $\text{CDCl}_3$ , 125 MHz)  $\delta$  180.8, 178.5, 172.3, 143.0, 137.4, 136.5, 135.2, 134.4, 133.0, 132.2, 132.1, 131.7, 131.2,

129.2, 129.0, 128.8, 128.1, 128.0, 127.7, 127.6, 126.0, 125.9, 125.6, 123.7, 121.9, 121.0, 120.3, 119.1, 112.3, 108.5, 70.5, 67.6, 64.0, 57.8, 30.8, 23.4 ppm. LRMS (ESI)  $[M+H]^+$  found  $m/z$  689. HRMS (ESI)  $[M+Na]^+$  found  $m/z$  711.1882, calcd for  $C_{41}H_{34}N_4NiO_3Na$  711.1882. HPLC (Chiralpak IA, *n*-hexane/*i*-propanol = 60/40, flow rate 1.0 mL/min,  $\lambda = 220$  nm),  $t_{minor} = 7.83$  min,  $t_{major} = 30.52$  min, de = 97 %

**Nickel(II)-(S)-BPB/(S)-2-amino-2-(5-methoxy-2-methyl-1H-indol-3-yl)acetic acid Schiff Base Complex 3n.**

Obtained as a red solid by flash column chromatography (petroleum ether/ethyl acetate = 1/1), yield 60 %. Mp 242-244°C;  $[\alpha]_D^{20} = +2120$  (c = 0.20 g/100 mL,  $CHCl_3$ ).  $^1H$  NMR ( $CDCl_3$ , 400 MHz)  $\delta$  10.64 (s, 1H), 9.08 (s, 1H), 8.47 (d,  $J = 6.8$  Hz, 2H), 8.18 (d,  $J = 7.2$  Hz, 1H), 7.52 (d,  $J = 4.0$  Hz, 2H), 7.43 (t,  $J = 8.0$  Hz, 2H), 7.35-7.30 (m, 1H), 7.21-7.14 (m, 2H), 7.09 (t,  $J = 8.4$  Hz, 1H), 6.90 (t,  $J = 7.6$  Hz, 1H), 6.72 (dd,  $J = 8.8$  Hz, 2.4 Hz, 1H), 6.58 (t,  $J = 7.6$  Hz, 1H), 6.41 (d,  $J = 8.0$  Hz, 1H), 5.60 (d,  $J = 8.0$  Hz, 1H), 4.95 (s, 1H), 4.20 (d,  $J = 11.6$  Hz, 1H), 3.69-3.63 (m, 5H), 3.46-3.44 (m, 1H), 3.22-3.15 (m, 1H), 2.60-2.53 (m, 2H), 2.24-2.17 (m, 2H), 1.70 (s, 3H) ppm.  $^{13}C$  NMR ( $CDCl_3$ , 125 MHz)  $\delta$  180.8, 177.7, 171.3, 153.1, 142.6, 135.0, 134.8, 134.4, 132.6, 131.7, 131.5, 130.3, 128.7, 128.6, 128.4, 127.4, 126.3, 126.1, 125.2, 123.2, 120.0, 111.3, 108.5, 106.9, 103.1, 69.7, 68.3, 63.3, 57.5, 55.9, 30.1, 23.2, 11.1 ppm. LRMS (ESI)  $[M+H]^+$  found  $m/z$  657. HRMS (ESI)  $[M+Na]^+$  found  $m/z$  679.1841, calcd for  $C_{37}H_{34}N_4NiO_4Na$  679.1831. HPLC (Chiralpak IA, *n*-hexane/*i*-propanol = 60/40, flow rate 1.0 mL/min,  $\lambda = 220$  nm),  $t_{minor} = 7.74$  min,

$t_{\text{major}} = 14.10$  min, de = 97 %.

**(S)-2-amino-2-(1H-indol-3-yl)acetic acid 4a.**

Obtained as a pink solid by column chromatography on C<sub>18</sub>-reversed phase (230-400 mesh) silica gel (methanol /water = 20/80), yield 93 %. Mp 214-216 °C;  $[\alpha]_{\text{D}}^{20} = +113.1$  (c = 0.31 g/100 mL, H<sub>2</sub>O). <sup>1</sup>H NMR (D<sub>2</sub>O, 400 MHz):  $\delta$  7.53 (d,  $J = 8.0$  Hz, 1H), 7.39 (d,  $J = 8.4$  Hz, 1H), 7.33 (s, 1H), 7.13 (dd,  $J = 7.6$  Hz, 8.0 Hz, 1H), 7.04 (dd,  $J = 7.6$  Hz, 8.0 Hz, 1H), 4.96 (s, 1H) ppm. <sup>13</sup>C NMR (D<sub>2</sub>O, 125 MHz):  $\delta$  173.9, 136.2, 126.5, 124.8, 122.3, 119.9, 118.3, 112.1, 107.6 51.2 ppm. LRMS (EI)  $[\text{M}]^+$  found  $m/z$  190. HRMS (EI)  $[\text{M}]^+$  found  $m/z$  190.0739, calcd. for C<sub>10</sub>H<sub>10</sub>N<sub>2</sub>O<sub>2</sub> 190.0742. HPLC (Chirobiotic T, methanol/water = 60/40, flow rate 1.0 mL/min,  $\lambda = 220$  nm),  $t_{\text{major}} = 9.36$  min,  $t_{\text{minor}} = 17.36$  min, de = 98%.

**(S)-2-amino-2-(2-phenyl-1H-indol-3-yl)acetic acid 4m.**

Obtained as a pink solid by column chromatography on C<sub>18</sub>-reversed phase (230-400 mesh) silica gel (methanol /water = 20/80), yield 85 %. Mp >300 °C;  $[\alpha]_{\text{D}}^{25} = +53.3$  (c = 0.10 g/100 mL, H<sub>2</sub>O). <sup>1</sup>H NMR (D<sub>2</sub>O, 400 MHz):  $\delta$  7.70-7.66 (m, 3H), 7.60-7.51 (m, 4H), 7.30 (t,  $J = 7.6$  Hz, 1H), 7.20 (t,  $J = 7.6$  Hz, 1H), 5.19 (s, 1H) ppm. <sup>13</sup>C NMR (D<sub>2</sub>O, 125 MHz):  $\delta$  174.2, 139.5, 135.8, 131.1, 129.1, 128.9, 128.8, 125.5, 122.5, 120.1, 118.6, 111.7, 104.6 50.8 ppm. LRMS (ESI)  $[\text{M}]^-$  found  $m/z$  265. HRMS (ESI)  $[\text{M}]^-$  found  $m/z$  265.0973, calcd. for C<sub>16</sub>H<sub>13</sub>N<sub>2</sub>O<sub>2</sub> 265.0977. HPLC (Chirobiotic T,

methanol/water = 80/20, flow rate 1.0 mL/min,  $\lambda = 220$  nm),  $t_{\text{major}} = 6.31$  min,  $t_{\text{minor}} = 20.68$  min, de = 97%.

Analytical high performance liquid chromatography was carried out using the Model 410 automated sampler, using the Chiralpak IA column or the Chiralpak AD column. The loading loop was 20  $\mu\text{L}$ . The eluting employed was an isocratic mixture of *n*-hexane and *i*-propanol (60/40 or 75/25 respectively) at a flow of 1 mL/min unless stated. Retention times are reported in minutes. The enantiomeric excess was calculated from the integration of the absorption peaks at 220 nm.

### 3a

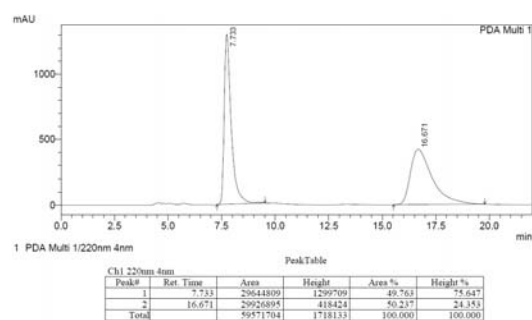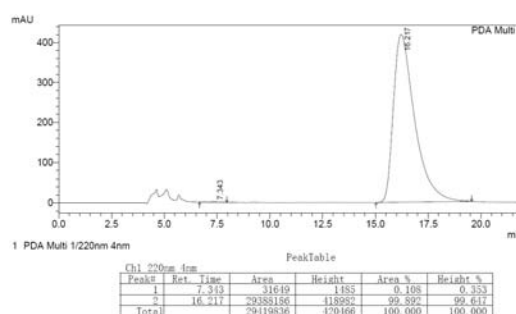

HPLC (Chiralpak IA, *n*-hexane/*i*-propanol = 60/40, flow rate 1.0 mL/min,  $\lambda = 220$  nm),  $t_{\text{major}} = 16.22$  min, de > 99%.

### 3b

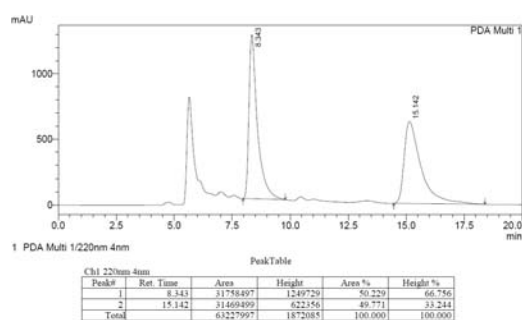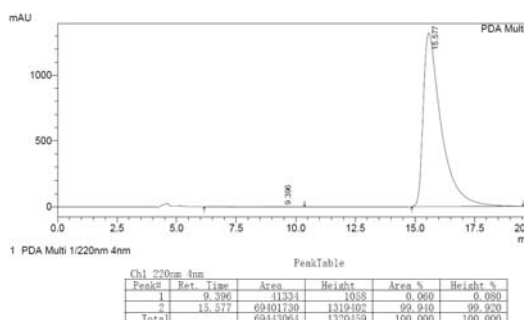

HPLC (Chiralpak IA, *n*-hexane/*i*-propanol = 60/40, flow rate 1.0 mL/min,  $\lambda = 220$  nm),  $t_{\text{major}} = 15.58$  min, de > 99%.

3c

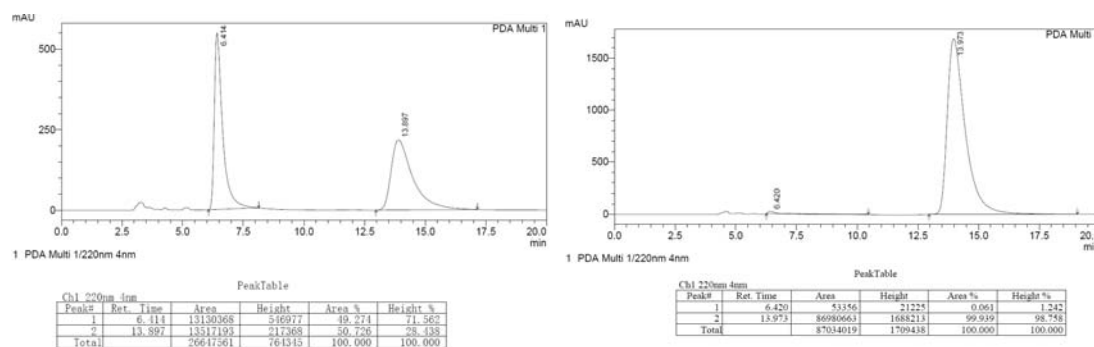

HPLC (Chiralpak IA, *n*-hexane/*i*-propanol = 60/40, flow rate 1.0 mL/min,  $\lambda = 220$  nm),  $t_{\text{major}} = 13.97$  min, de > 99%.

3d

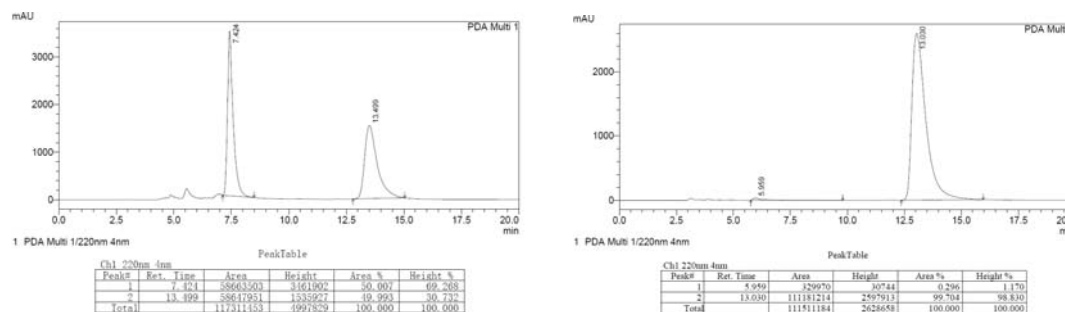

HPLC (Chiralpak IA, *n*-hexane/*i*-propanol = 60/40, flow rate 1.0 mL/min,  $\lambda = 220$  nm),  $t_{\text{major}} = 13.03$  min, de > 99%.

3e

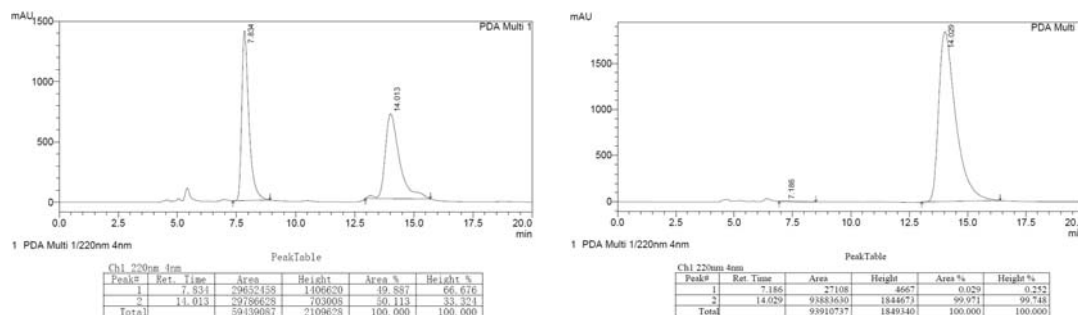

HPLC (Chiralpak IA, *n*-hexane/ *i*-propanol = 60/40, flow rate 1.0 mL/min,  $\lambda = 220$  nm),  $t_{\text{major}} = 14.03$  min, de > 99%.

### 3g

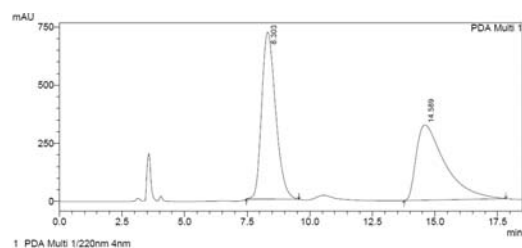

| PeakTable |           |          |         |         |          |
|-----------|-----------|----------|---------|---------|----------|
| Peak#     | Ret. Time | Area     | Height  | Area %  | Height % |
| 1         | 8.303     | 27883084 | 717921  | 51.717  | 68.915   |
| 2         | 14.589    | 26020874 | 523829  | 48.273  | 31.085   |
| Total     |           | 53903958 | 1041750 | 100.000 | 100.000  |

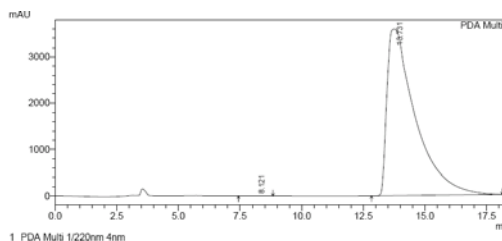

| PeakTable |           |           |         |         |          |
|-----------|-----------|-----------|---------|---------|----------|
| Peak#     | Ret. Time | Area      | Height  | Area %  | Height % |
| 1         | 8.121     | 839001    | 2477    | 0.029   | 0.009    |
| 2         | 13.731    | 287484074 | 3389543 | 99.971  | 99.991   |
| Total     |           | 287567974 | 3392020 | 100.000 | 100.000  |

HPLC (Chiralpak AD, *n*-hexane/*i*-propanol = 75/25, flow rate 1.0 mL/min,  $\lambda = 220$  nm),  $t_{\text{major}} = 13.73$  min, de > 99%.

### 3h

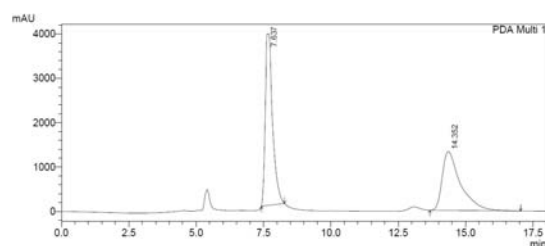

| PeakTable |           |           |         |         |          |
|-----------|-----------|-----------|---------|---------|----------|
| Peak#     | Ret. Time | Area      | Height  | Area %  | Height % |
| 1         | 7.637     | 72810703  | 3865973 | 53.531  | 71.127   |
| 2         | 14.352    | 63417092  | 1328338 | 46.469  | 28.873   |
| Total     |           | 135227895 | 5194310 | 100.000 | 100.000  |

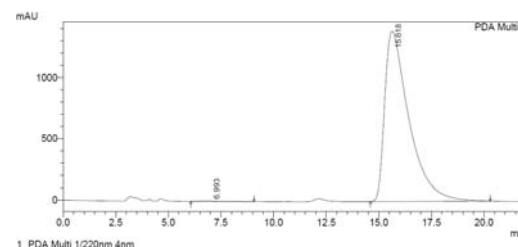

| PeakTable |           |           |         |         |          |
|-----------|-----------|-----------|---------|---------|----------|
| Peak#     | Ret. Time | Area      | Height  | Area %  | Height % |
| 1         | 6.993     | 109405    | 3015    | 0.098   | 0.216    |
| 2         | 15.618    | 111216602 | 1390724 | 99.902  | 99.784   |
| Total     |           | 111227547 | 1393739 | 100.000 | 100.000  |

HPLC (Chiralpak IA, *n*-hexane/*i*-propanol = 60/40, flow rate 1.0 mL/min,  $\lambda = 220$  nm),  $t_{\text{major}} = 15.62$  min, de > 99%.

### 3i

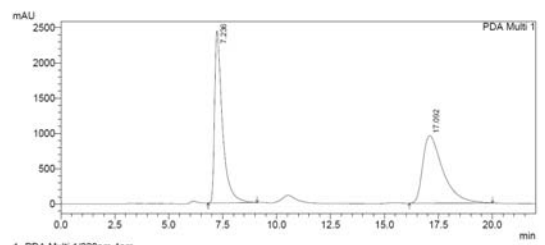

| PeakTable |           |           |         |         |          |
|-----------|-----------|-----------|---------|---------|----------|
| Peak#     | Ret. Time | Area      | Height  | Area %  | Height % |
| 1         | 7.236     | 61628825  | 2138668 | 92.791  | 71.504   |
| 2         | 17.092    | 62145136  | 951613  | 30.209  | 28.496   |
| Total     |           | 123773961 | 3396280 | 100.000 | 100.000  |

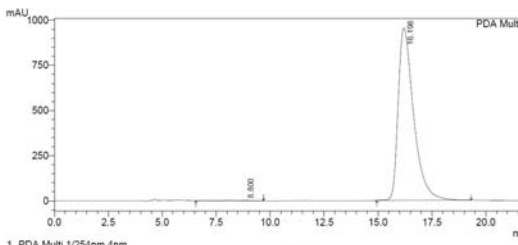

| PeakTable |           |          |        |         |          |
|-----------|-----------|----------|--------|---------|----------|
| Peak#     | Ret. Time | Area     | Height | Area %  | Height % |
| 1         | 8.800     | 60837    | 1733   | 0.127   | 0.181    |
| 2         | 16.108    | 17662402 | 951334 | 99.873  | 99.819   |
| Total     |           | 17723239 | 953067 | 100.000 | 100.000  |

HPLC (Chiralpak IA, *n*-hexane/*i*-propanol = 60/40, flow rate 1.0 mL/min,  $\lambda = 220$  nm),  $t_{\text{major}} = 16.20$  min, de > 99%.

3j

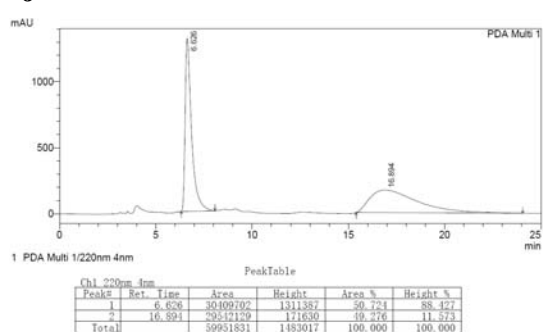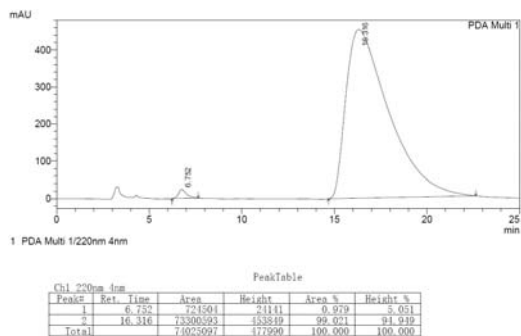

HPLC (Chiralpak IA, *n*-hexane/*i*-propanol = 60/40, flow rate 1.0 mL/min,  $\lambda = 220$  nm),  
 $t_{\text{minor}} = 6.75$  min,  $t_{\text{major}} = 16.32$  min, de = 98 %.

3k

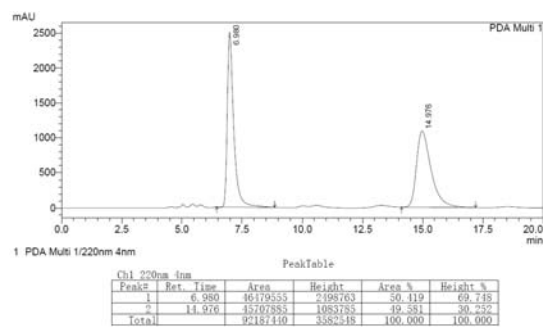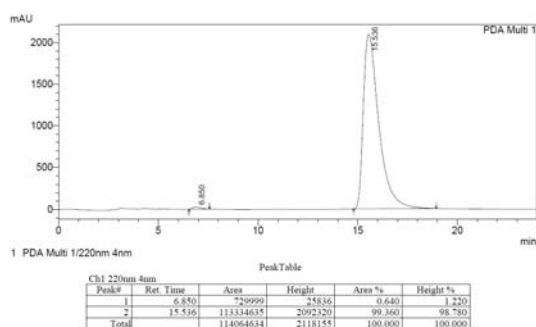

HPLC (Chiralpak IA, *n*-hexane/*i*-propanol = 60/40, flow rate 1.0 mL/min,  $\lambda = 220$  nm),  
 $t_{\text{minor}} = 6.85$  min,  $t_{\text{major}} = 15.53$  min, de = 98 %.

3l

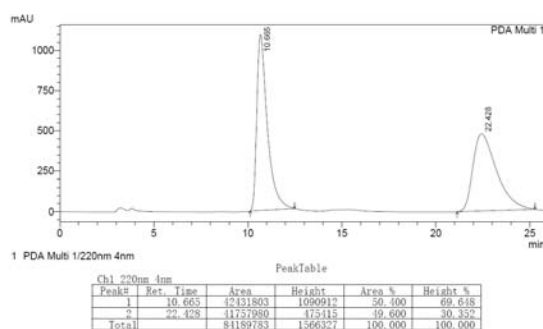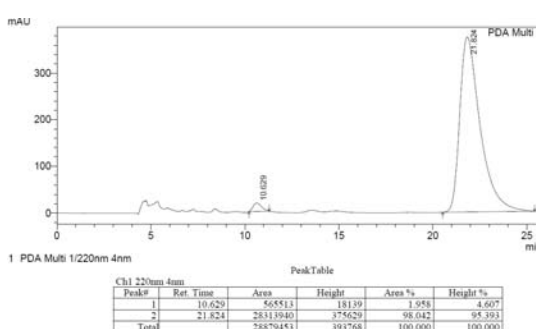

HPLC (Chiralpak IA, *n*-hexane/*i*-propanol = 60/40, flow rate 1.0 mL/min,  $\lambda = 220$  nm),  
 $t_{\text{minor}} = 10.63$  min,  $t_{\text{major}} = 21.82$  min, de = 96%.

### 3m

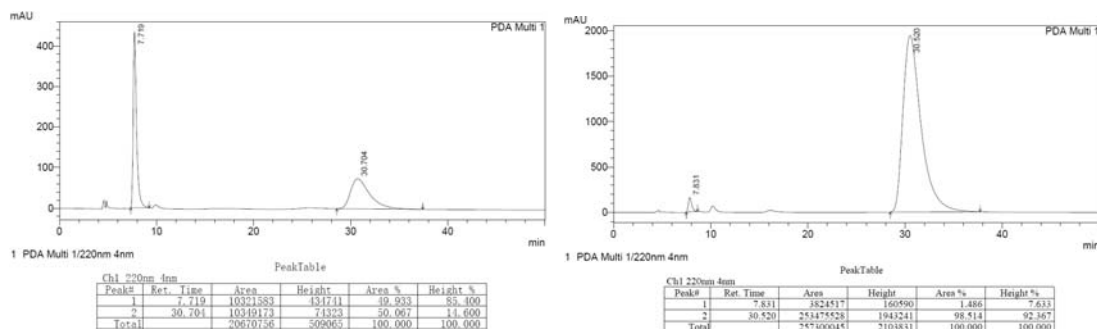

HPLC (Chiralpak IA, *n*-hexane/*i*-propanol = 60/40, flow rate 1.0 mL/min,  $\lambda = 220$  nm),  $t_{\text{minor}} = 7.83$  min,  $t_{\text{major}} = 30.52$  min, de = 97%.

### 3n

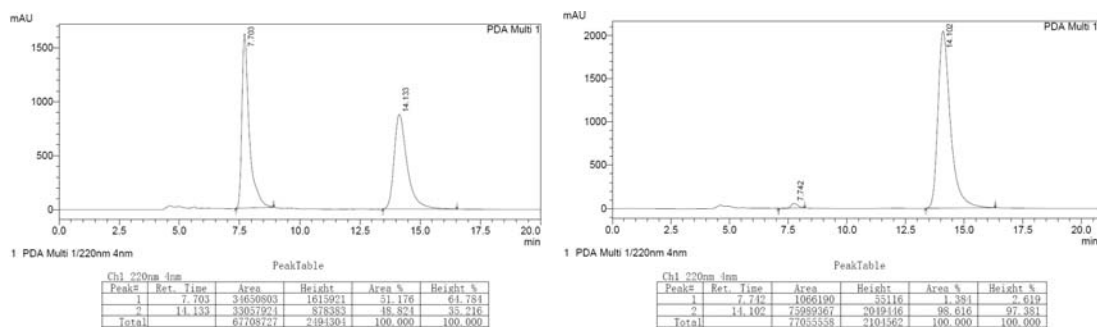

HPLC (Chiralpak IA, *n*-hexane/*i*-propanol = 60/40, flow rate 1.0 mL/min,  $\lambda = 220$  nm),  $t_{\text{minor}} = 7.74$  min,  $t_{\text{major}} = 14.10$  min, de = 97%.

Analytical high performance liquid chromatography was carried out using the Model 410 automated sampler, using the Chirobiotic T column. The loading loop was 10  $\mu$ L. The eluting employed was an isocratic mixture of methanol and water (60/40 or 80/20 respectively) at a flow of 1.0 mL/min unless stated. Retention times are reported in minutes. The enantiomeric excess was calculated from the integration of the absorption peaks at 220 nm.

### rac-4a

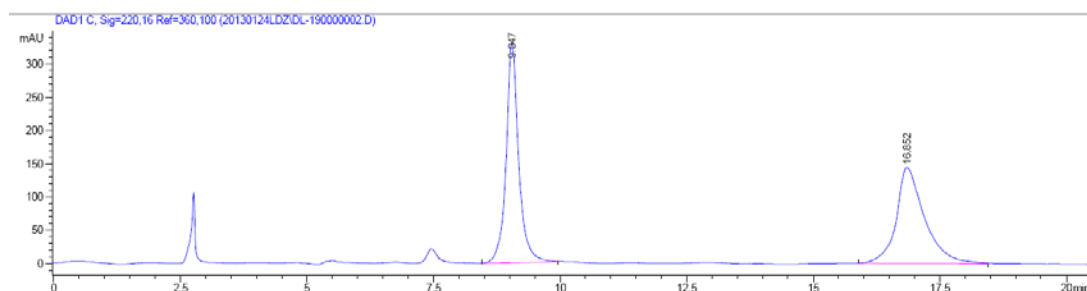



Signal 1: DAD1 C, Sig=220,16 Ref=360,100

| Peak # | RetTime [min] | Type | Width [min] | Area [mAU*s] | Height [mAU] | Area %  |
|--------|---------------|------|-------------|--------------|--------------|---------|
| 1      | 9.047         | BB   | 0.2533      | 5704.29053   | 330.60065    | 50.4806 |
| 2      | 16.852        | BB   | 0.5345      | 5595.66602   | 144.28442    | 49.5194 |

Totals : 1.13000e4 474.88507

**(S)-4a**

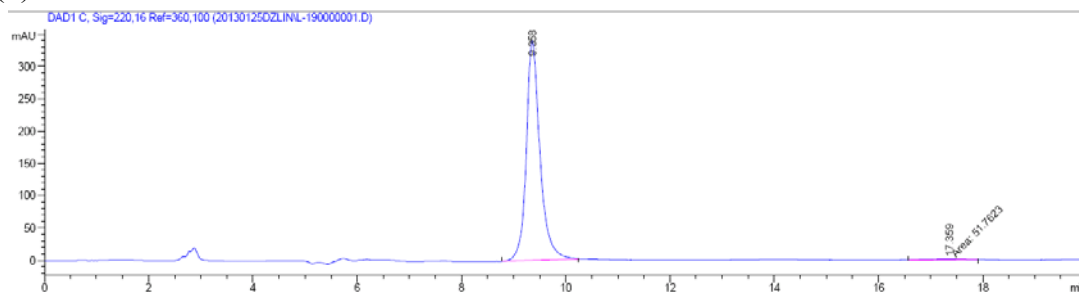

Signal 1: DAD1 C, Sig=220,16 Ref=360,100

| Peak # | RetTime [min] | Type | Width [min] | Area [mAU*s] | Height [mAU] | Area %  |
|--------|---------------|------|-------------|--------------|--------------|---------|
| 1      | 9.358         | BB   | 0.2734      | 6216.33008   | 339.80539    | 99.1742 |
| 2      | 17.359        | MM   | 0.9366      | 51.76229     | 9.21086e-1   | 0.8258  |

Totals : 6268.09237 340.72648

HPLC (Chirobiotic T, methanol/water = 60/40, flow rate 1.0 mL/min,  $\lambda = 220$  nm),  
 $t_{\text{major}} = 9.36$  min,  $t_{\text{minor}} = 17.36$  min, de = 98%.

**rac-4m**

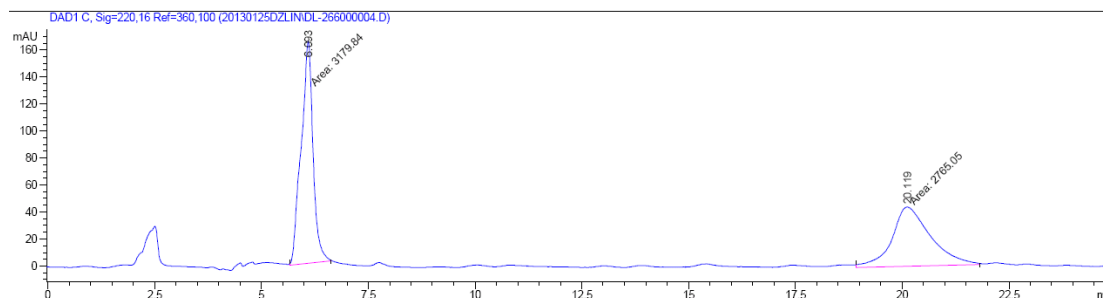

Signal 1: DAD1 C, Sig=220,16 Ref=360,100

| Peak # | RetTime [min] | Type | Width [min] | Area [mAU*s] | Height [mAU] | Area %  |
|--------|---------------|------|-------------|--------------|--------------|---------|
| 1      | 6.093         | MM   | 0.3221      | 3179.84351   | 164.54597    | 53.4887 |
| 2      | 20.119        | MM   | 1.0505      | 2765.04858   | 43.87062     | 46.5113 |

Totals : 5944.89209 208.41660

**(S)-4m**

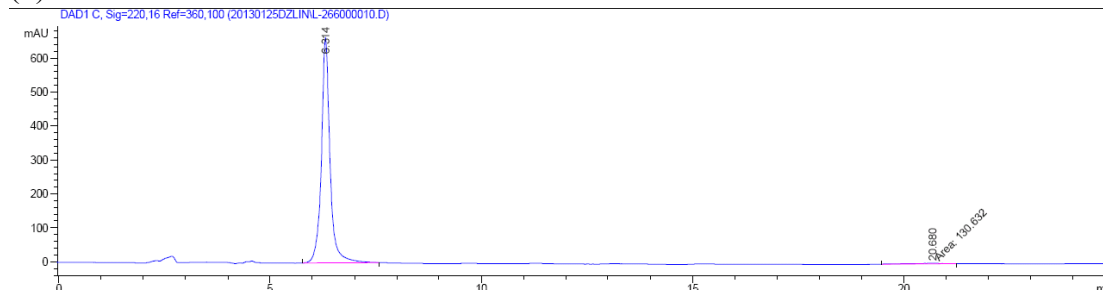

Signal 1: DAD1 C, Sig=220,16 Ref=360,100

| Peak # | RetTime [min] | Type | Width [min] | Area [mAU*s] | Height [mAU] | Area %  |
|--------|---------------|------|-------------|--------------|--------------|---------|
| 1      | 6.314         | BB   | 0.2075      | 9506.65625   | 662.25110    | 98.6445 |
| 2      | 20.680        | MM   | 1.4954      | 130.63235    | 1.45597      | 1.3555  |

Totals : 9637.28860 663.70707

HPLC (Chirobiotic T, methanol/water = 80/20, flow rate 1.0 mL/min,  $\lambda = 220$  nm),  
 $t_{\text{major}} = 6.31$  min,  $t_{\text{minor}} = 20.68$  min, de = 97%.

## (G) Copies of $^1\text{H}$ NMR and $^{13}\text{C}$ NMR Spectra for the Products

### Nickel(II)-(S)-BPB/(S)-2-amino-2-(1H-indol-3-yl)acetic acid Schiff Base Complex

3a.

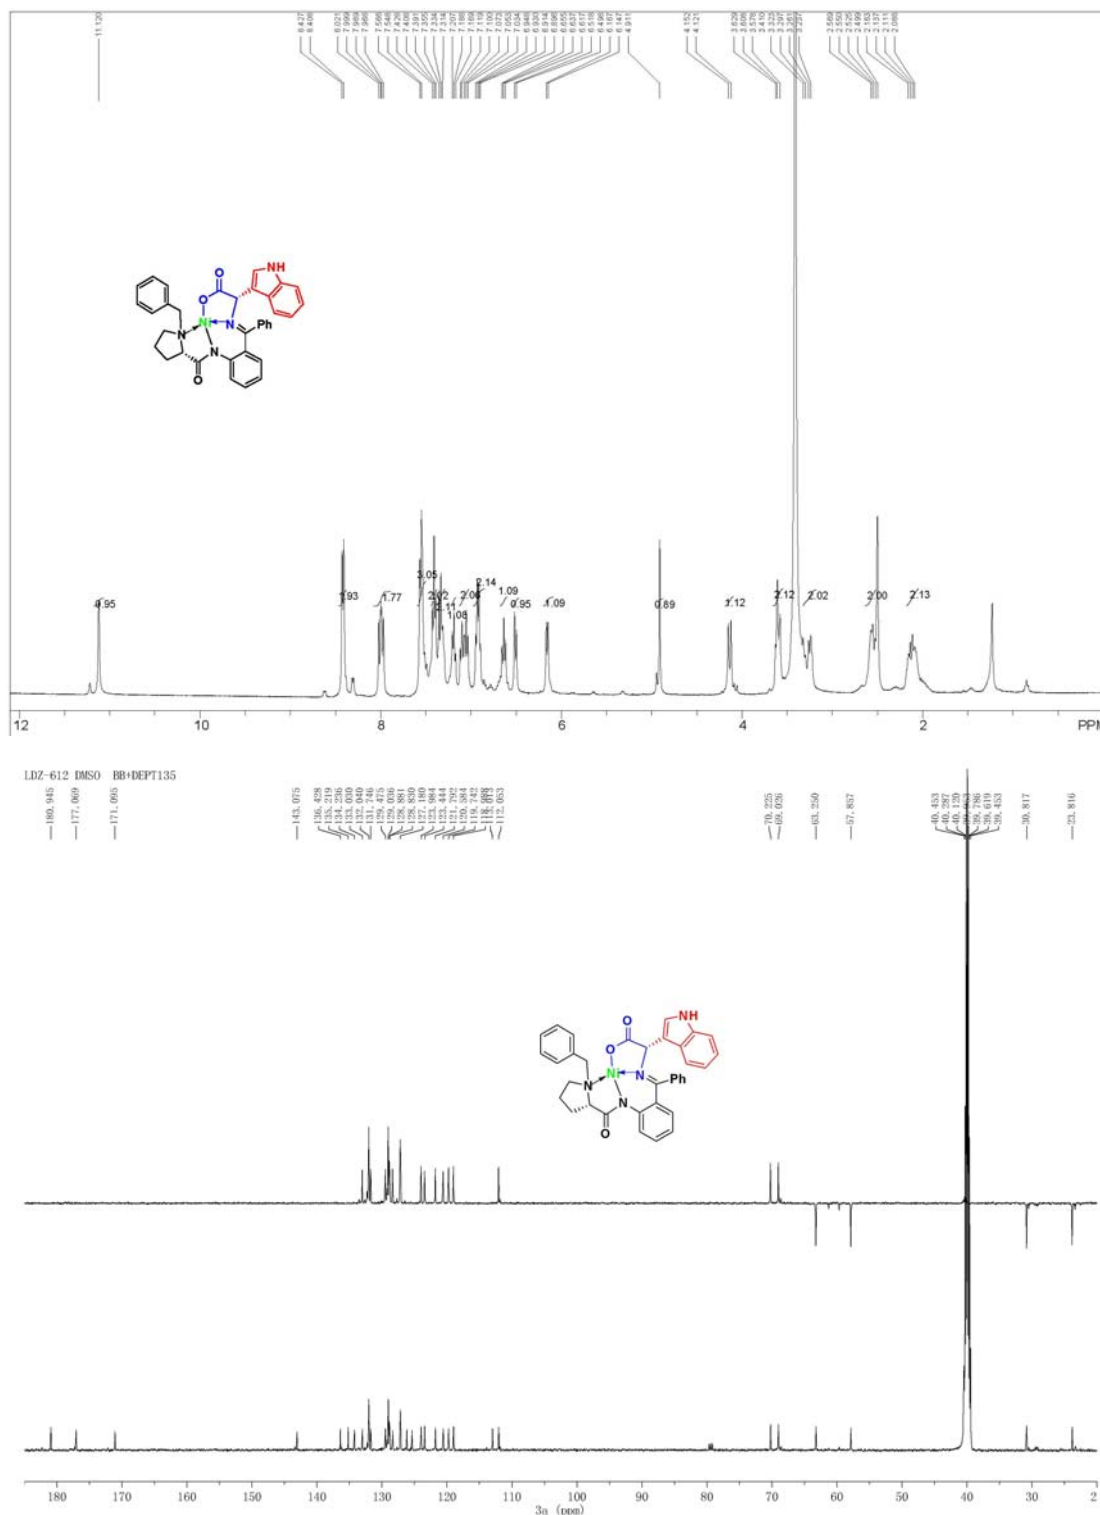

Nickel(II)-(S)-BPB/(S)-2-amino-2-(5-methoxy-1H-indol-3-yl)acetic acid Schiff  
Base Complex 3b.

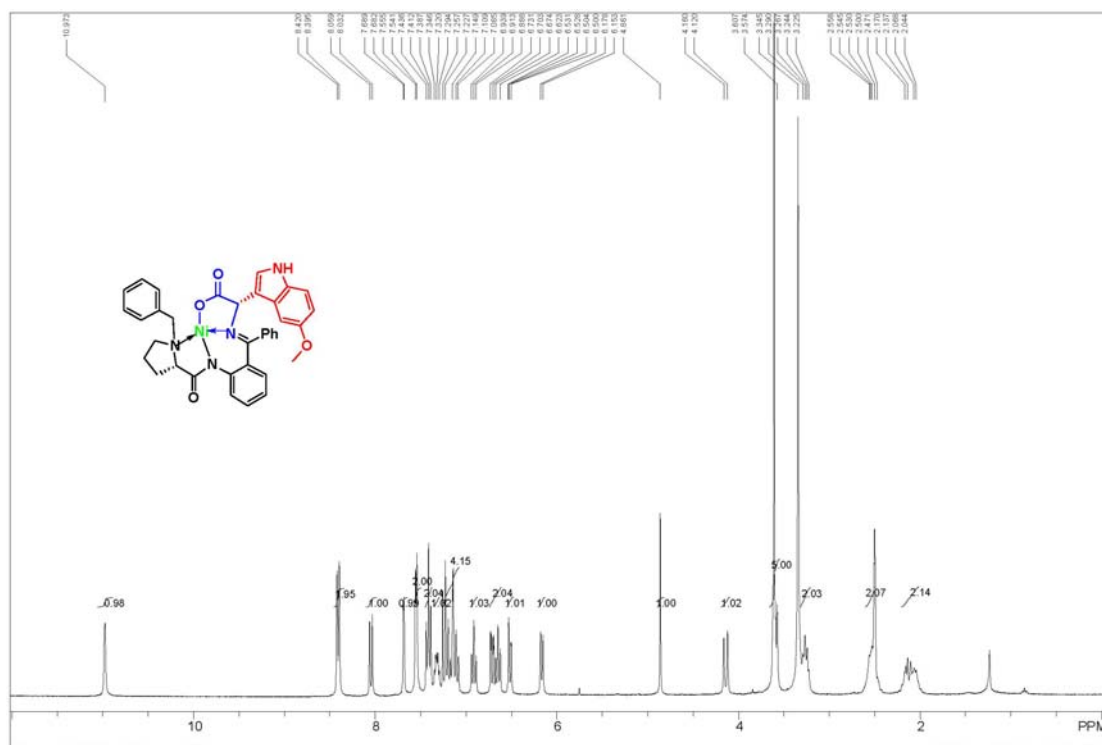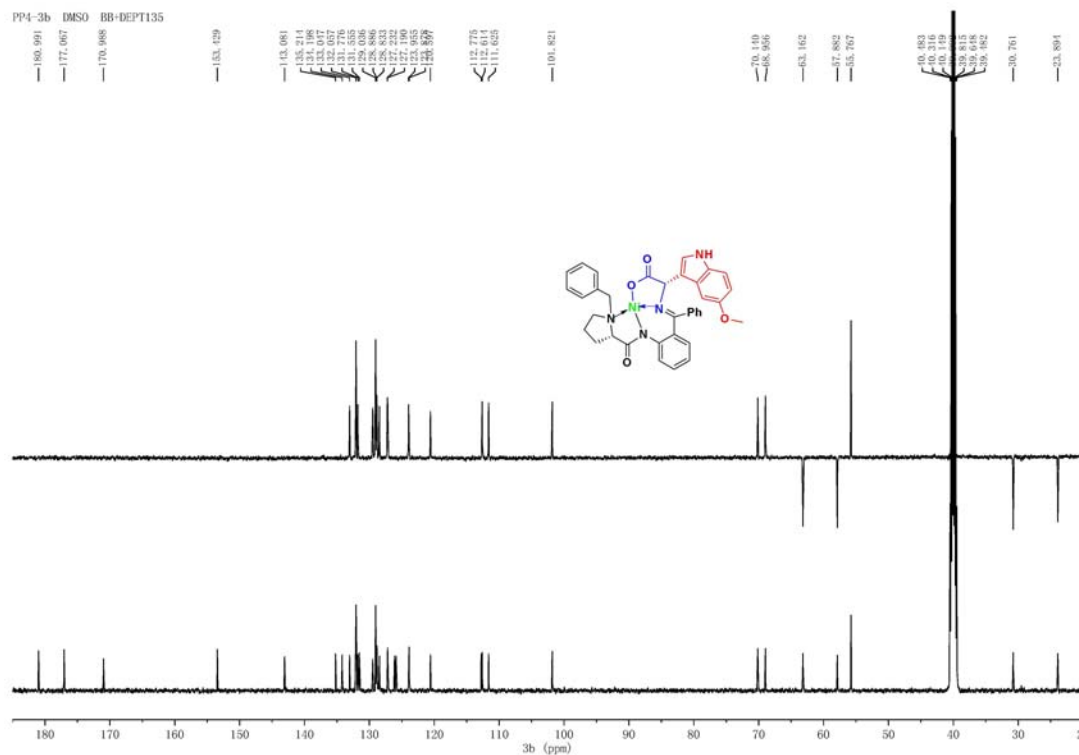

### Nickel(II)-(S)-BPB/(S)-2-amino-2-(5-fluoro-1H-indol-3-yl)acetic acid Schiff Base

#### Complex 3c.

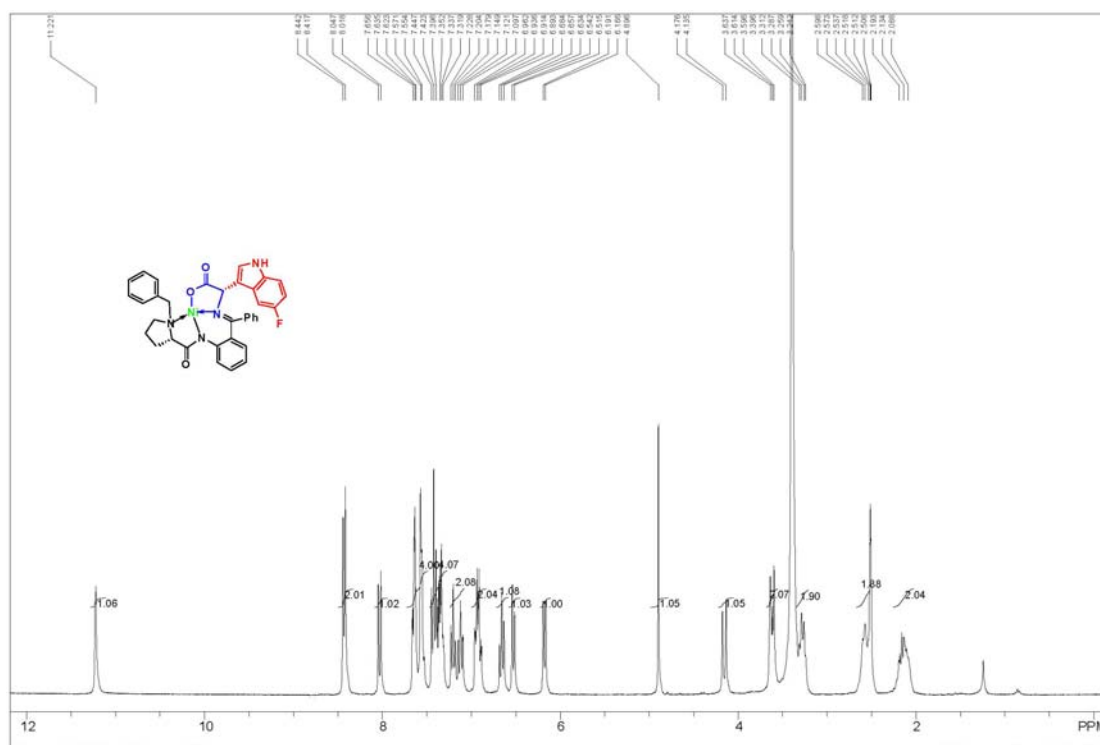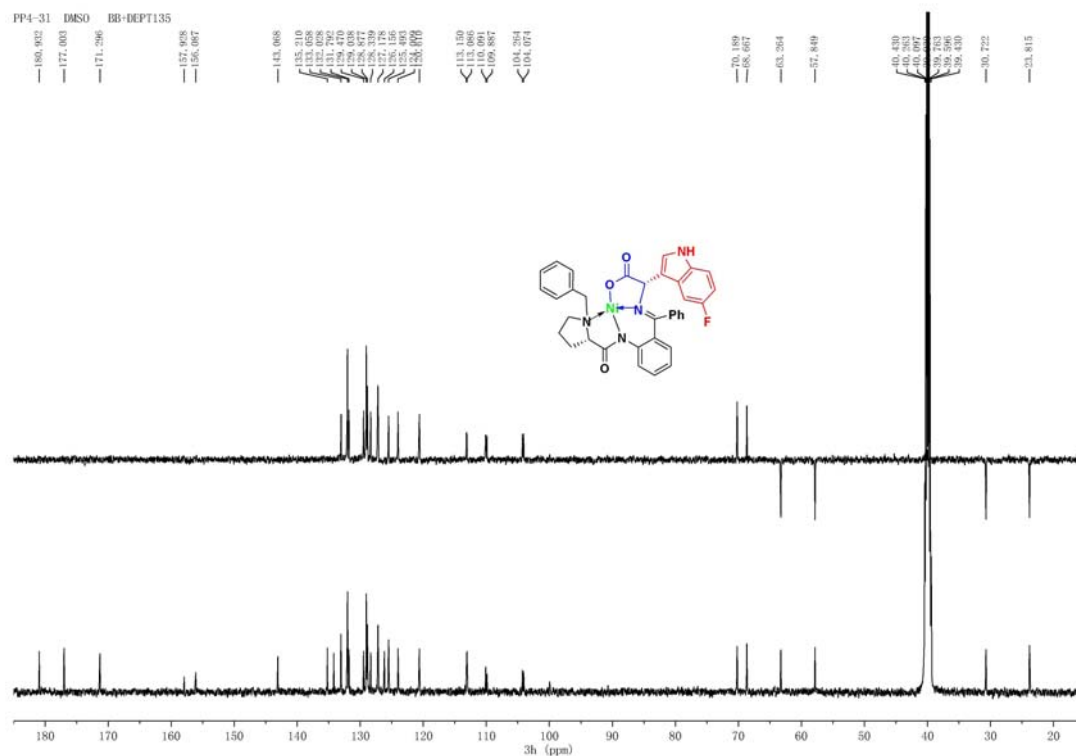

**Nickel(II)-(S)-BPB/(S)-2-amino-2-(5-chloro-1H-indol-3-yl)acetic acid Schiff Base  
Complex 3d.**

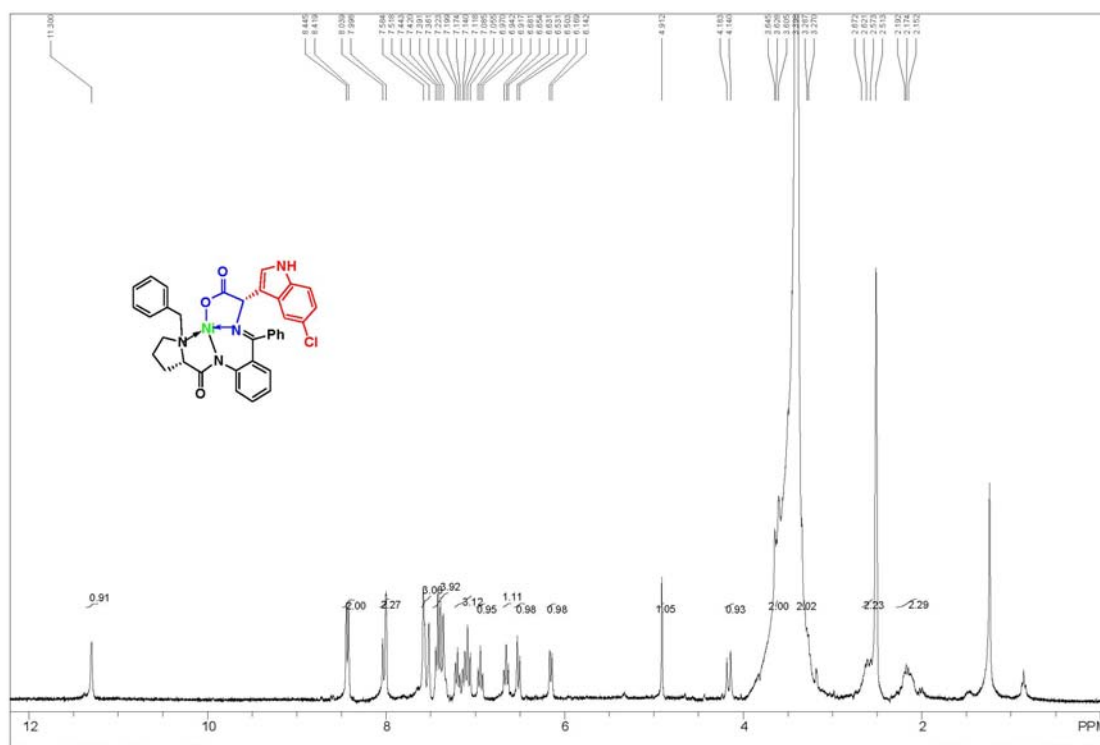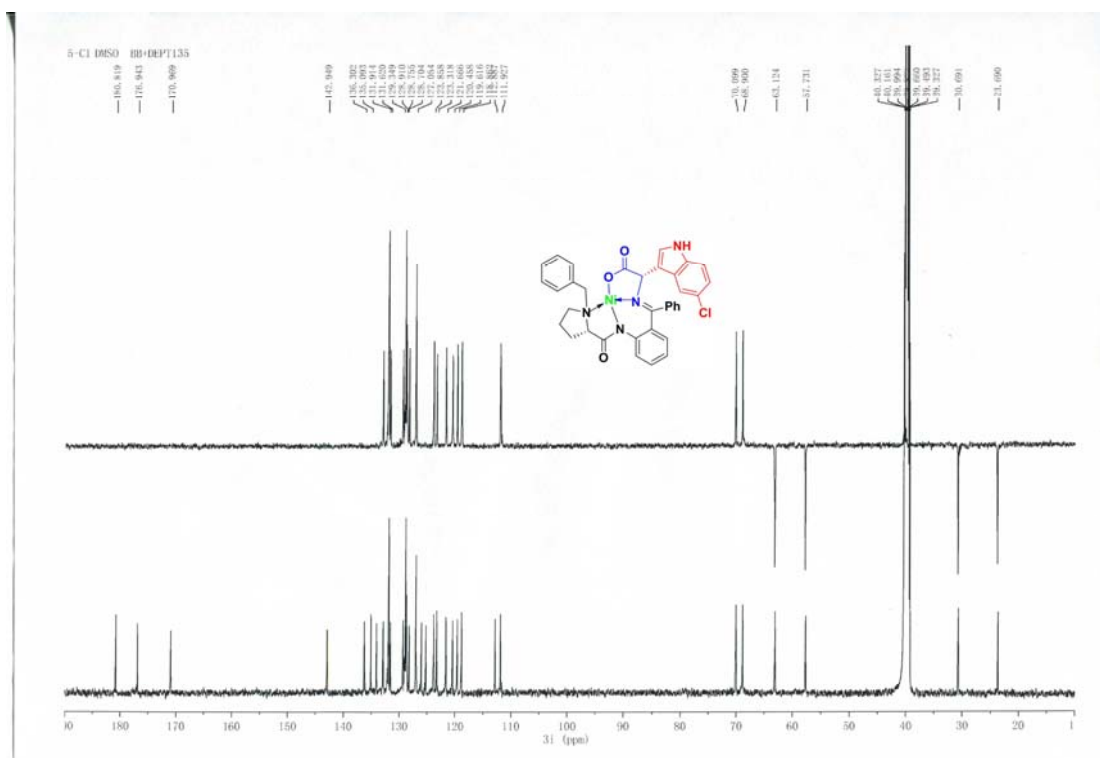

## Nickel(II)-(S)-BPB/(S)-2-amino-2-(5-bromo-1H-indol-3-yl)acetic acid Schiff Base

### Complex 3e.

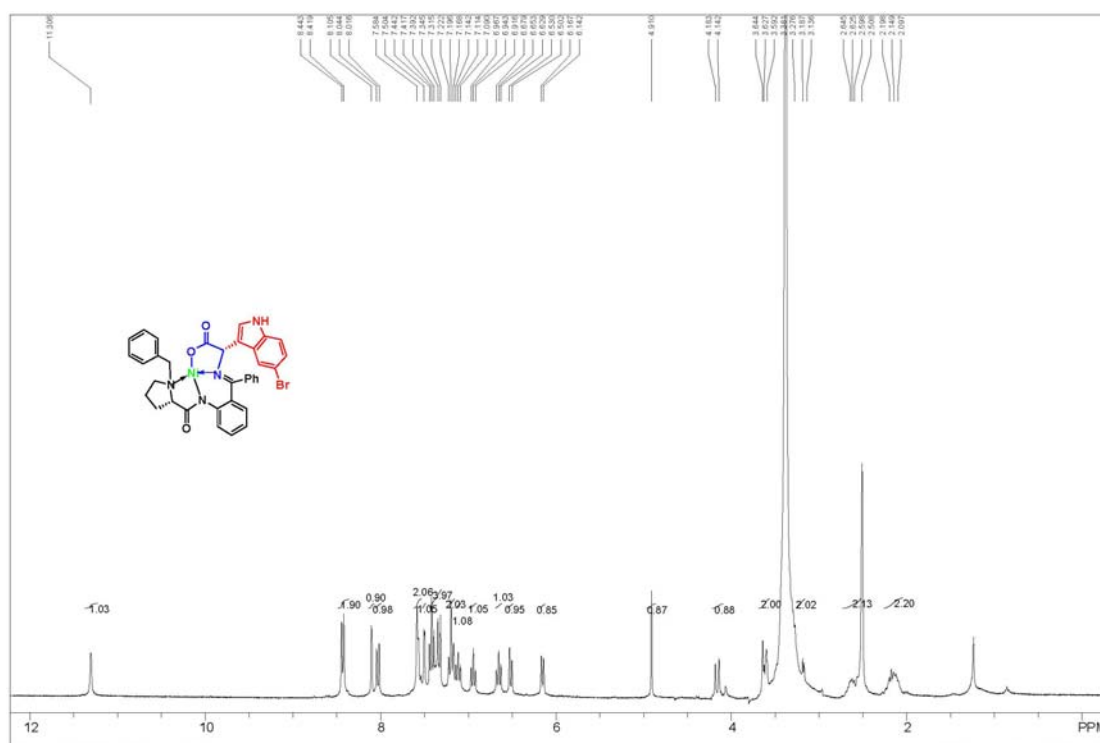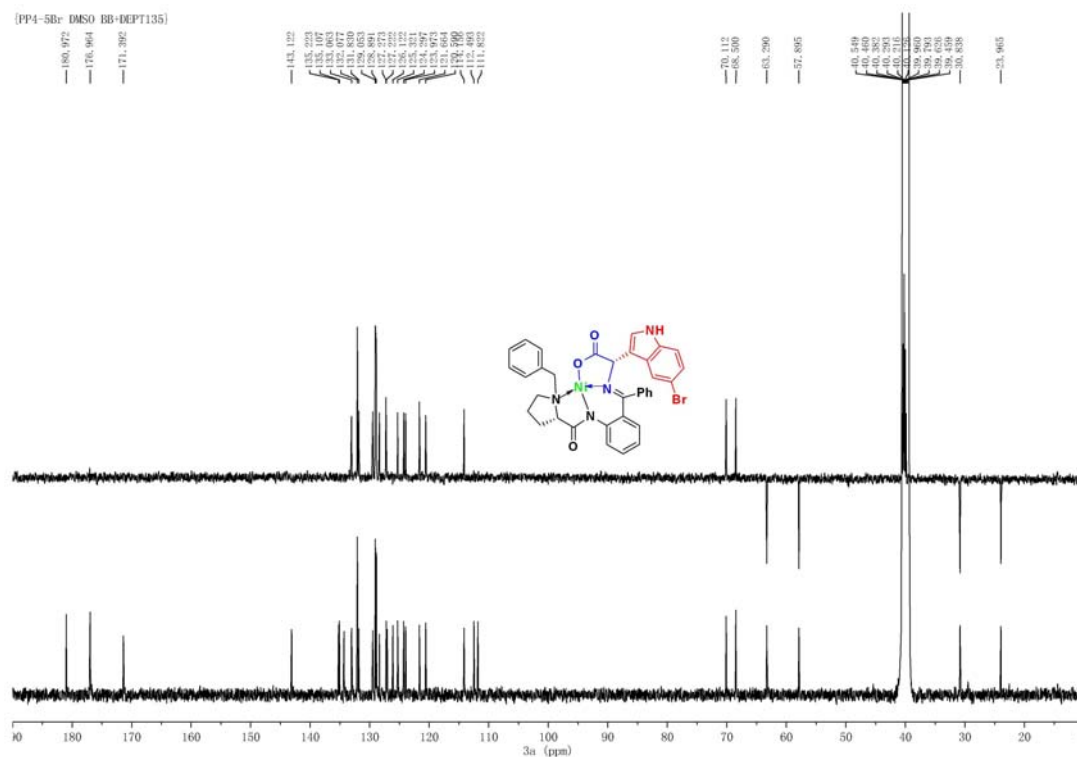

### Nickel(II)-(S)-BPB/(S)-2-amino-2-(4-methyl-1H-indol-3-yl)acetic acid Schiff Base

#### Complex 3g.

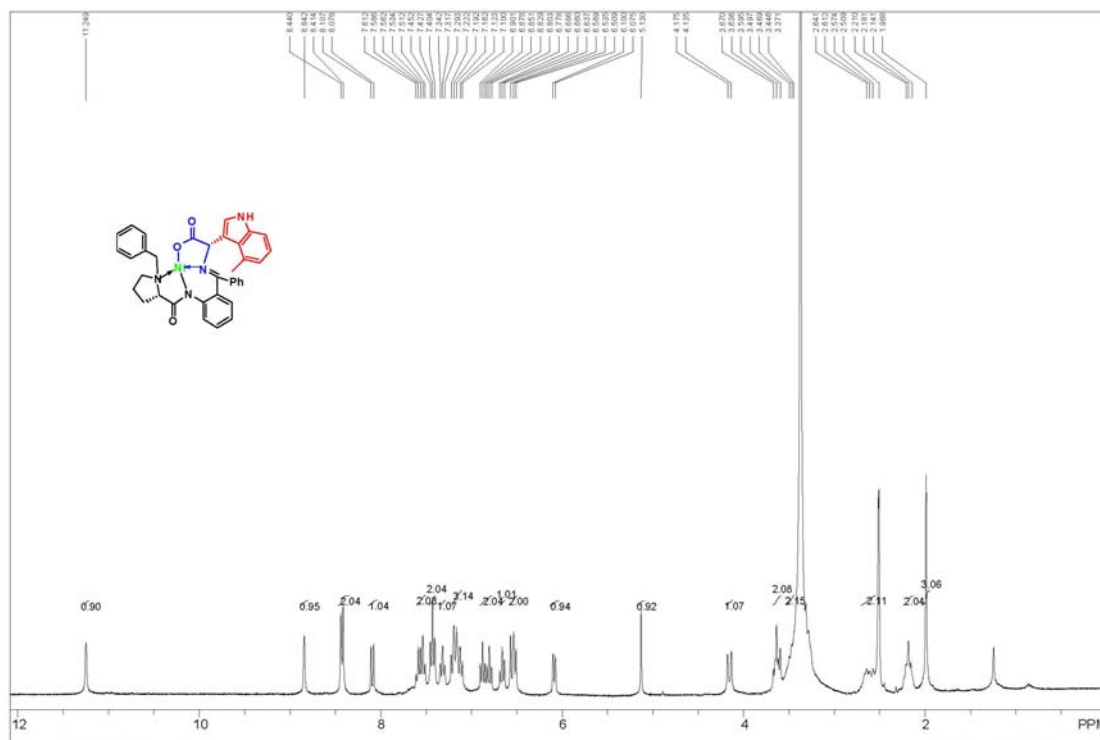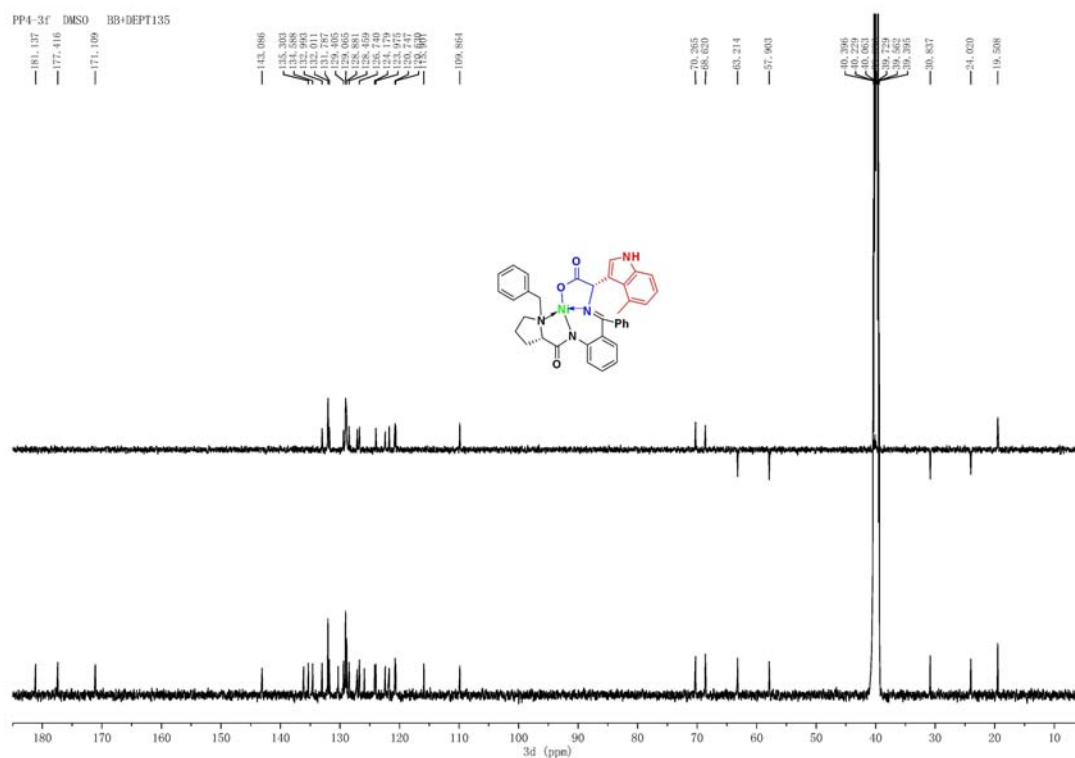





## Nickel(II)-(S)-BPB/(S)-2-amino-2-(6-methyl-1H-indol-3-yl)acetic acid Schiff Base

### Complex 3i.

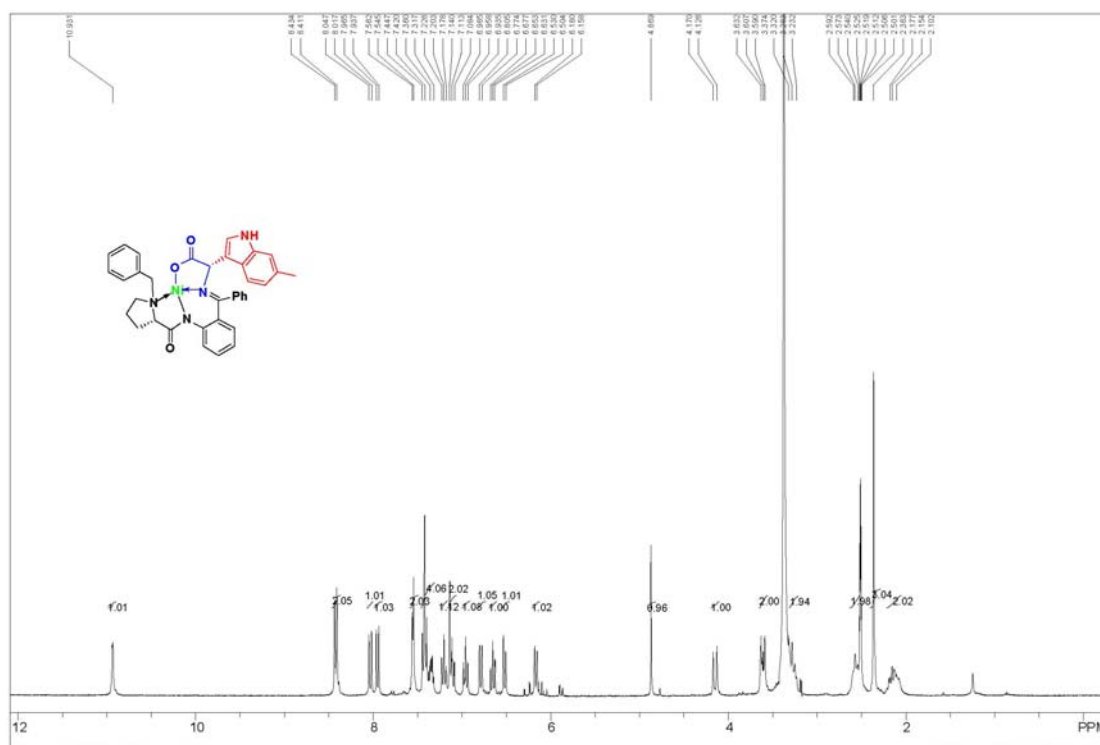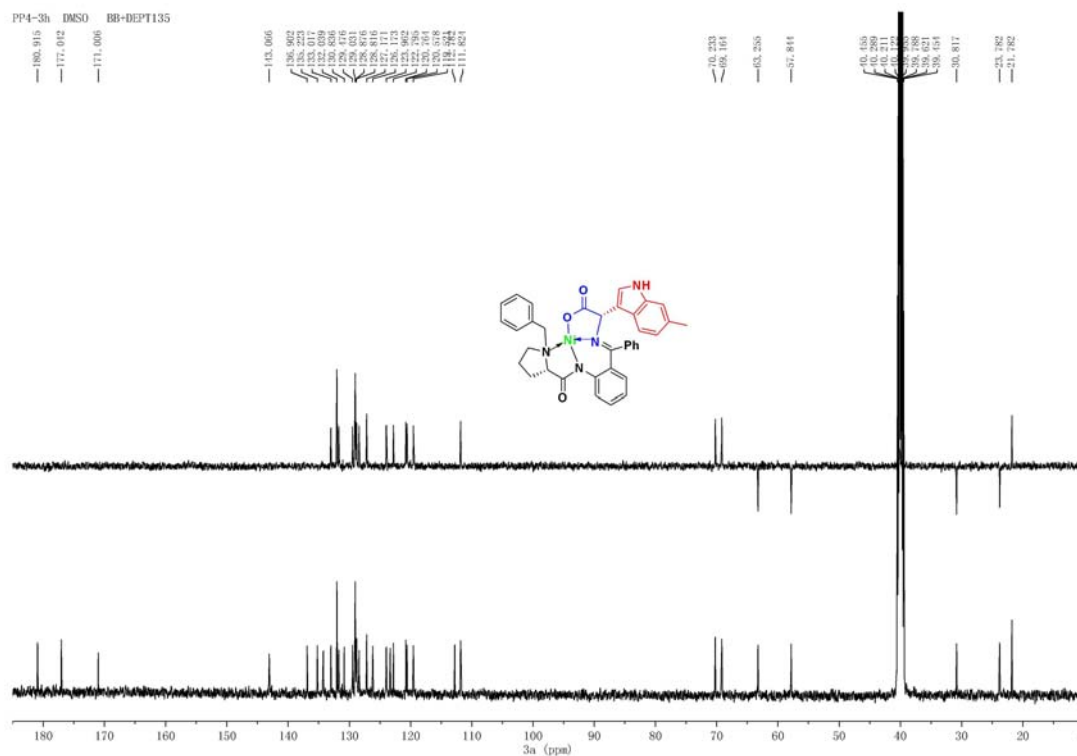

### Nickel(II)-(S)-BPB/(S)-2-amino-2-(7-methyl-1H-indol-3-yl)acetic acid Schiff Base

#### Complex 3j.

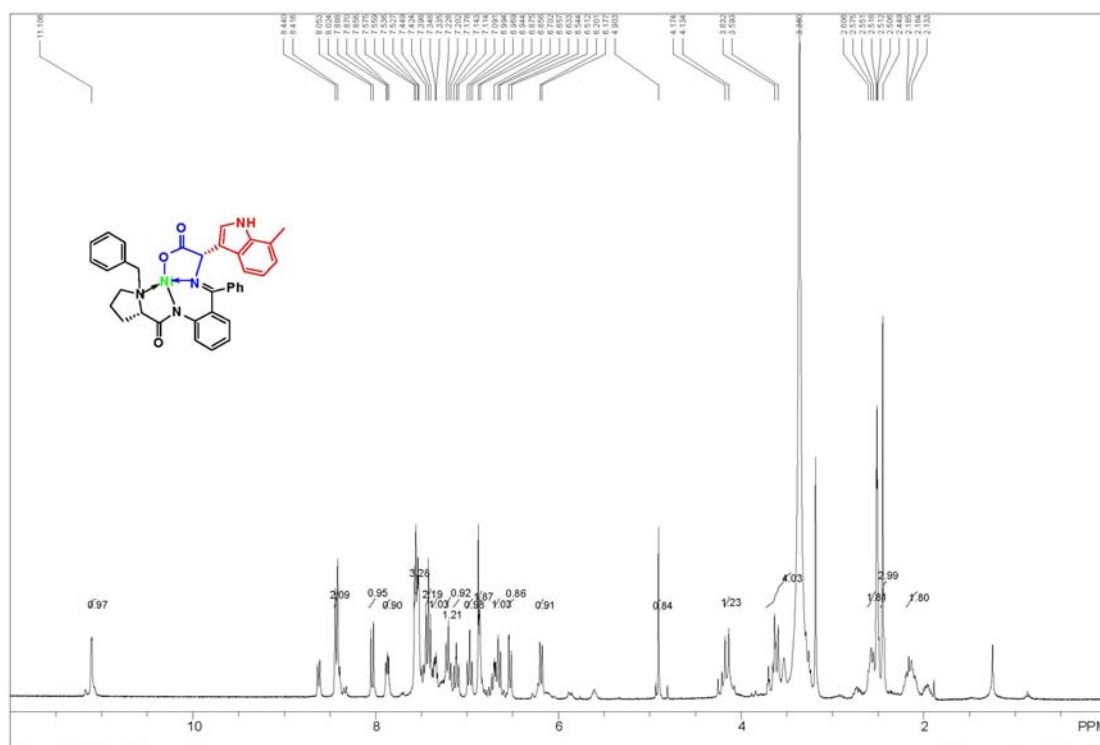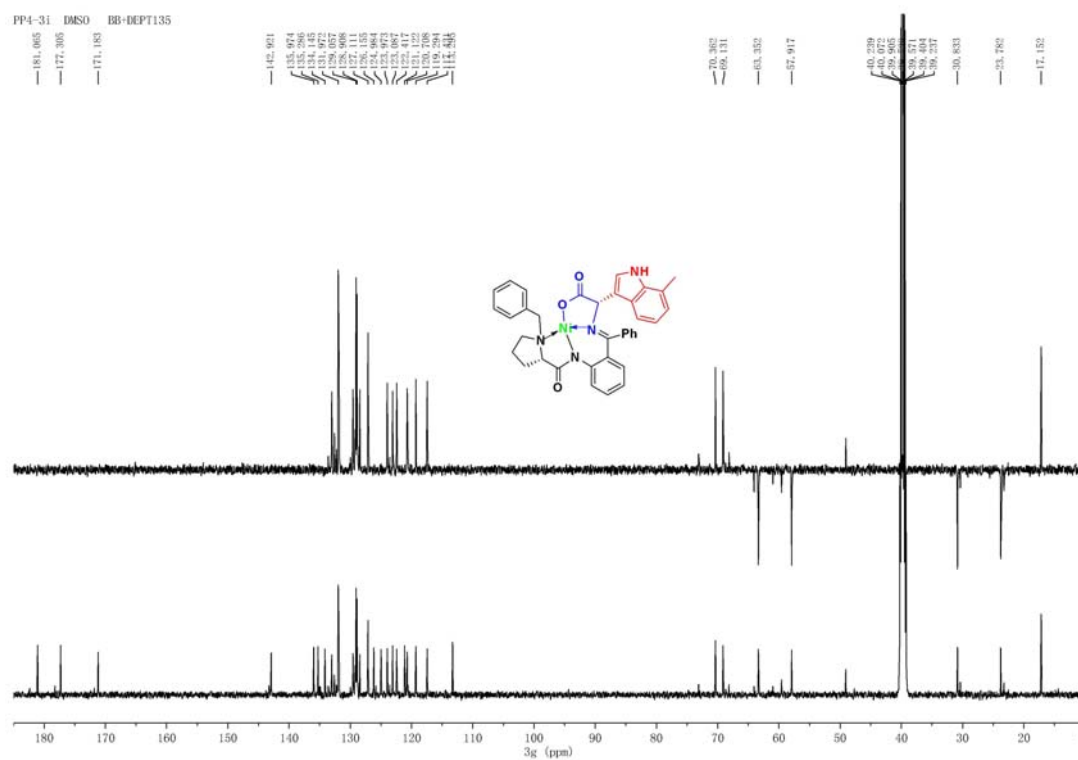

### Nickel(II)-(S)-BPB/(S)-2-amino-2-(2-methyl-1H-indol-3-yl)acetic acid Schiff Base

#### Complex 3k.

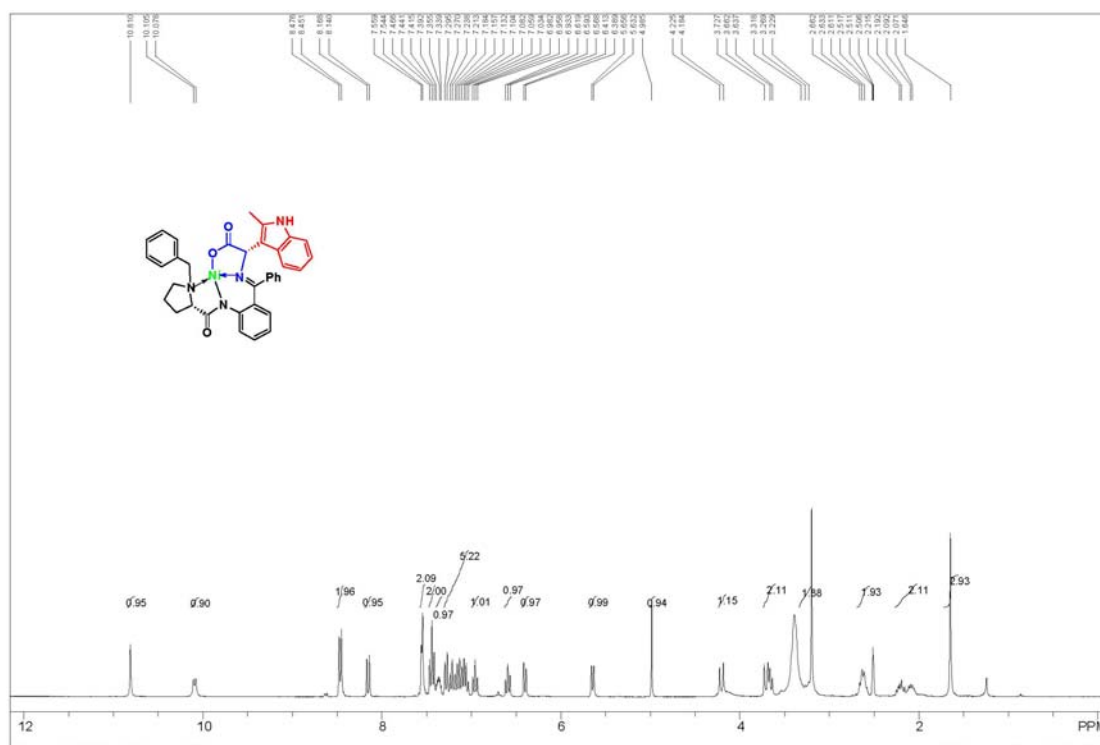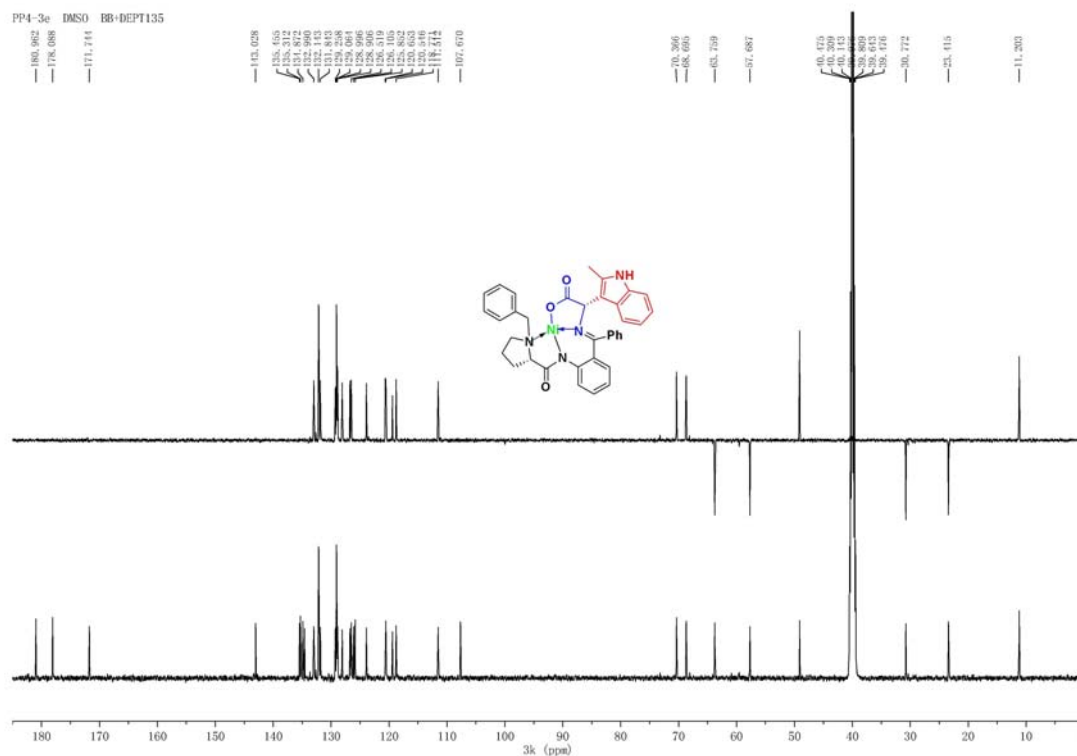

**Nickel(II)-(S)-BPB/(S)-2-amino-2-(2-(ethoxycarbonyl)-1H-indol-3-yl)acetic acid  
Schiff Base Complex 3l.**

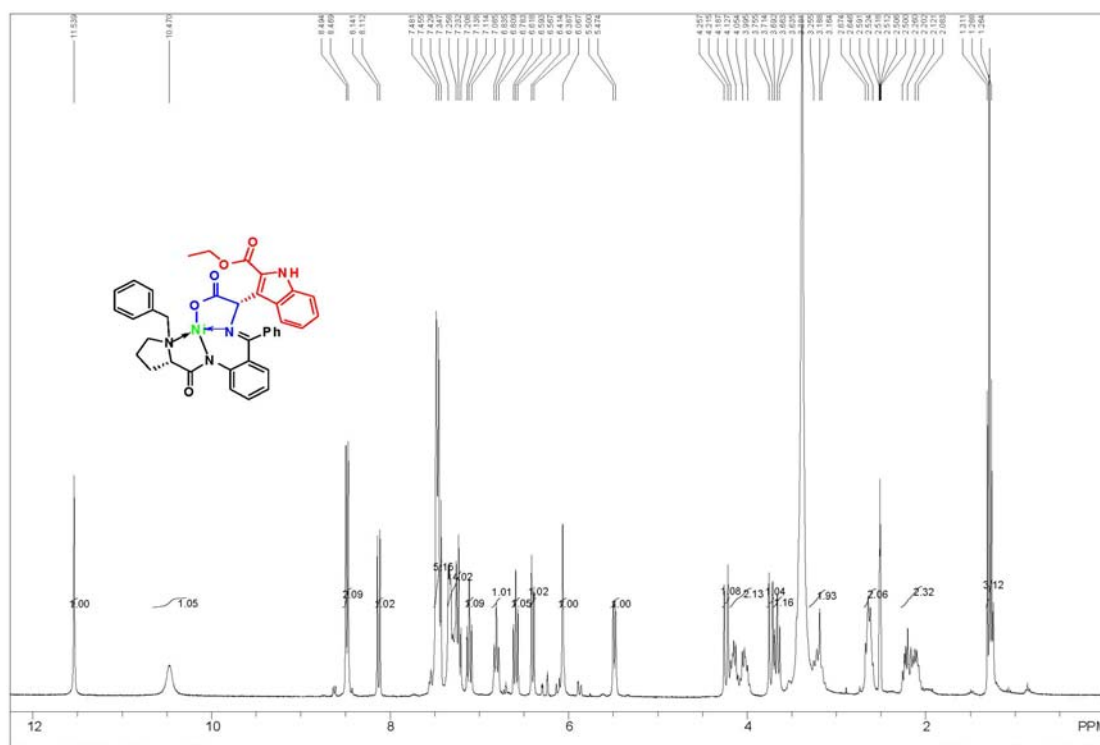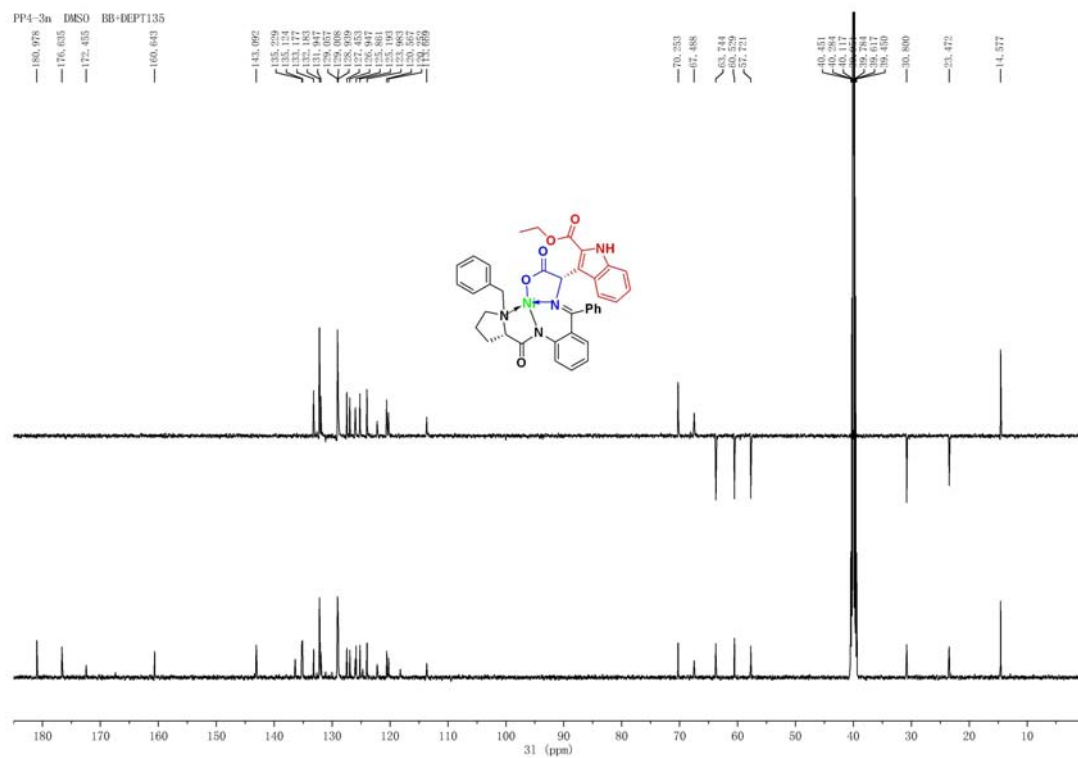

## Nickel(II)-(S)-BPB/(S)-2-amino-2-(2-phenyl-1H-indol-3-yl)acetic acid Schiff Base

### Complex 3m.

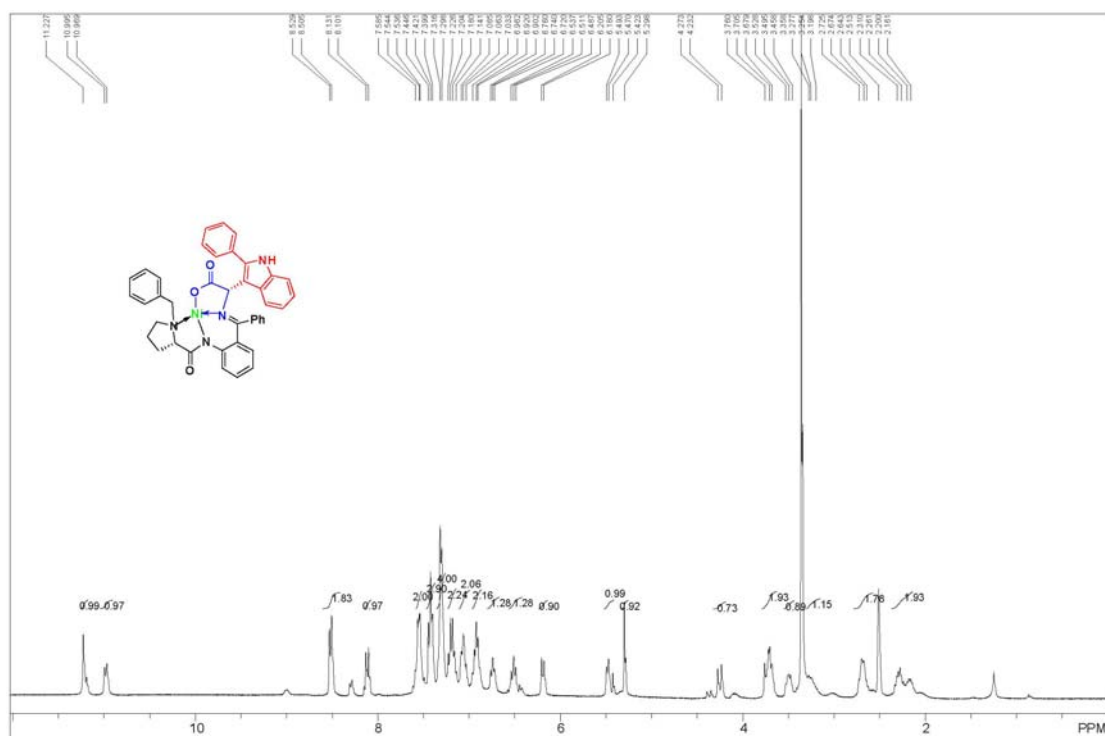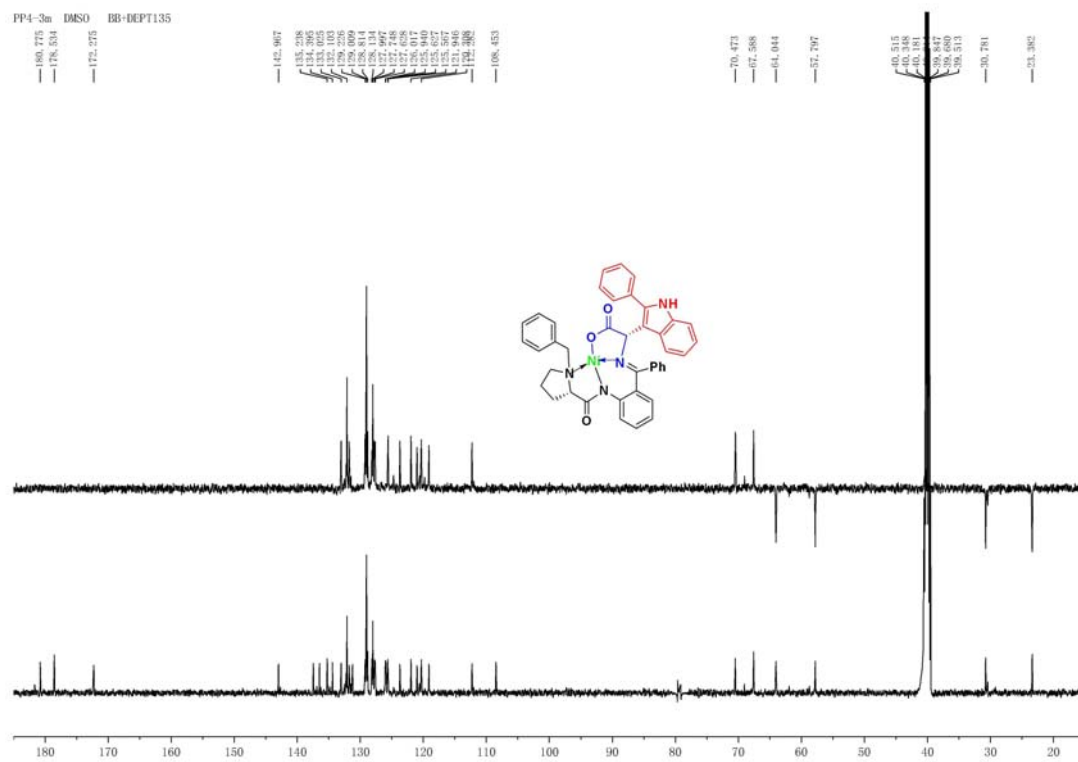

**Nickel(II)-(S)-BPB/(S)-2-amino-2-(5-methoxy-2-methyl-1H-indol-3-yl)acetic acid  
Schiff Base Complex 3n.**

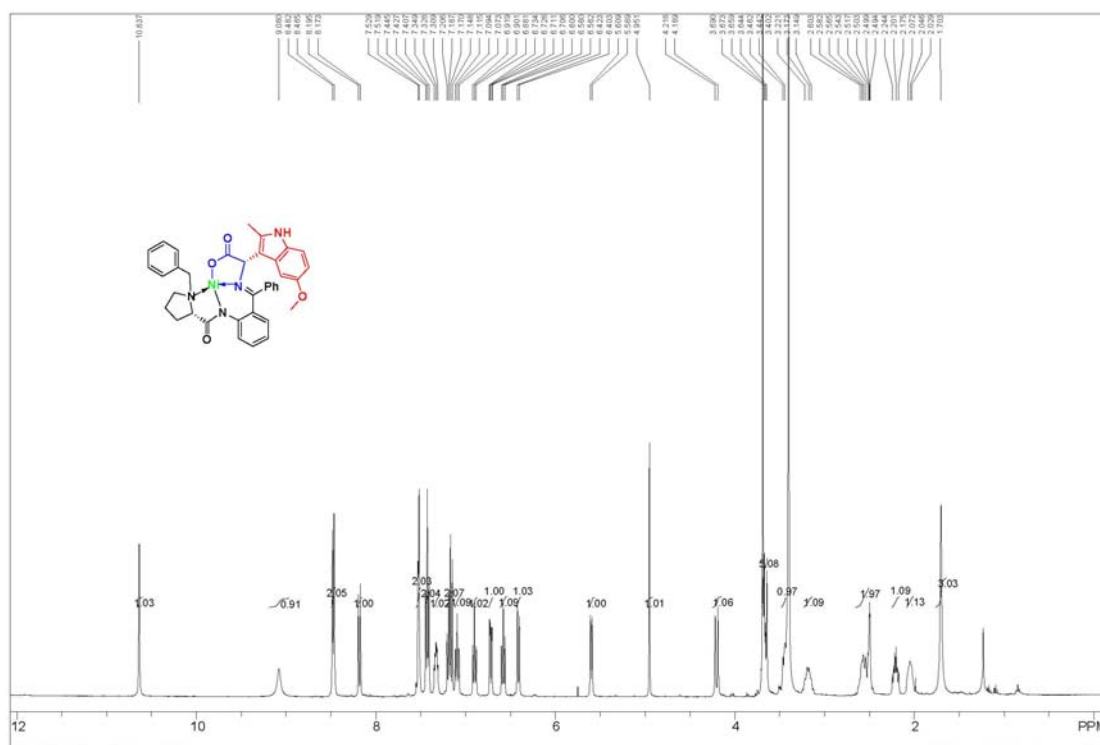

PP4-3d DMSO BB-DEPT-135 Aug 7 2012

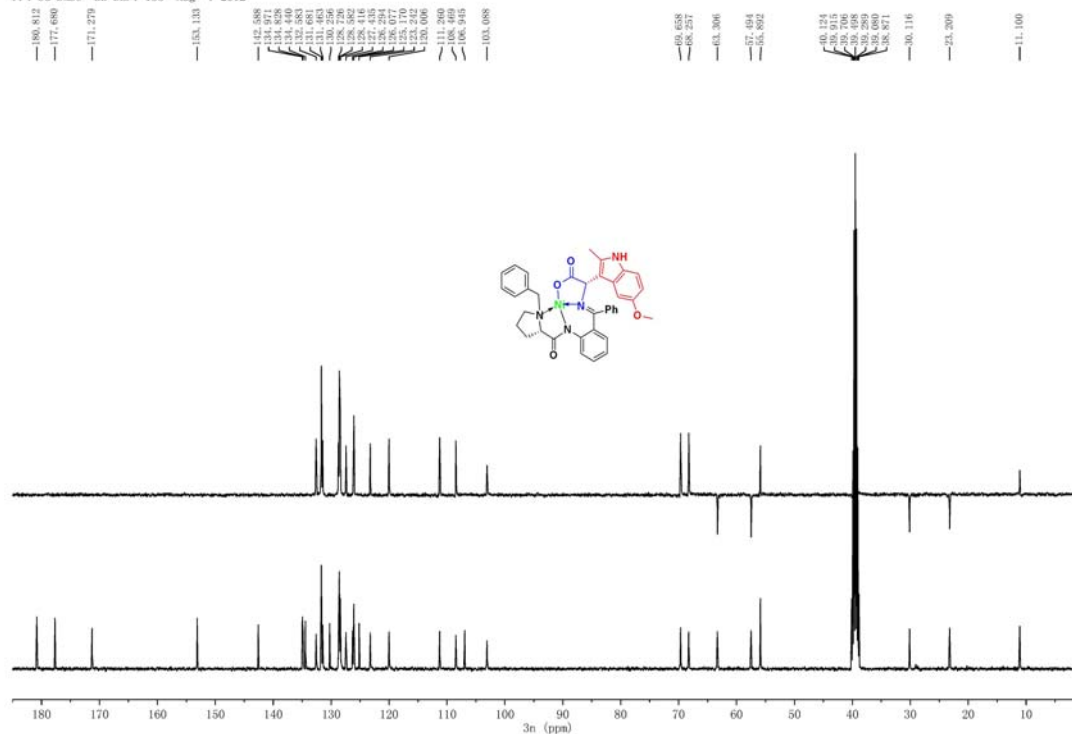

**(S)-2-amino-2-(1H-indol-3-yl)acetic acid 4a.**

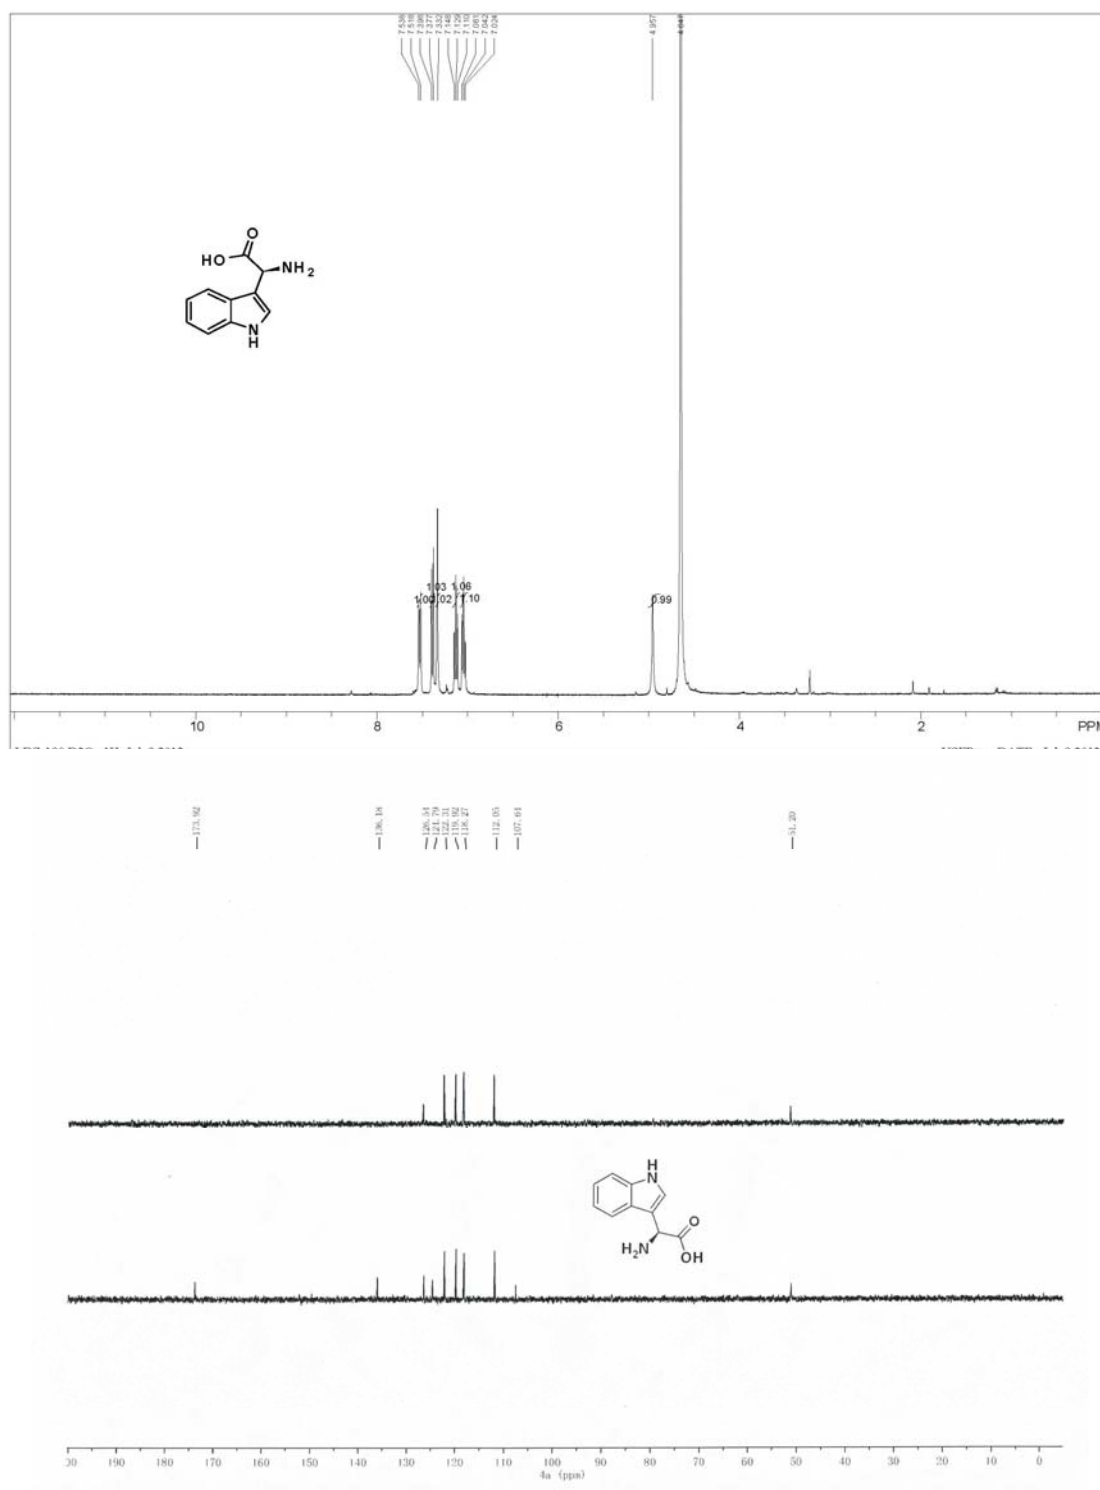



**(S)-2-amino-2-(2-phenyl-1H-indol-3-yl)acetic acid 4m.**

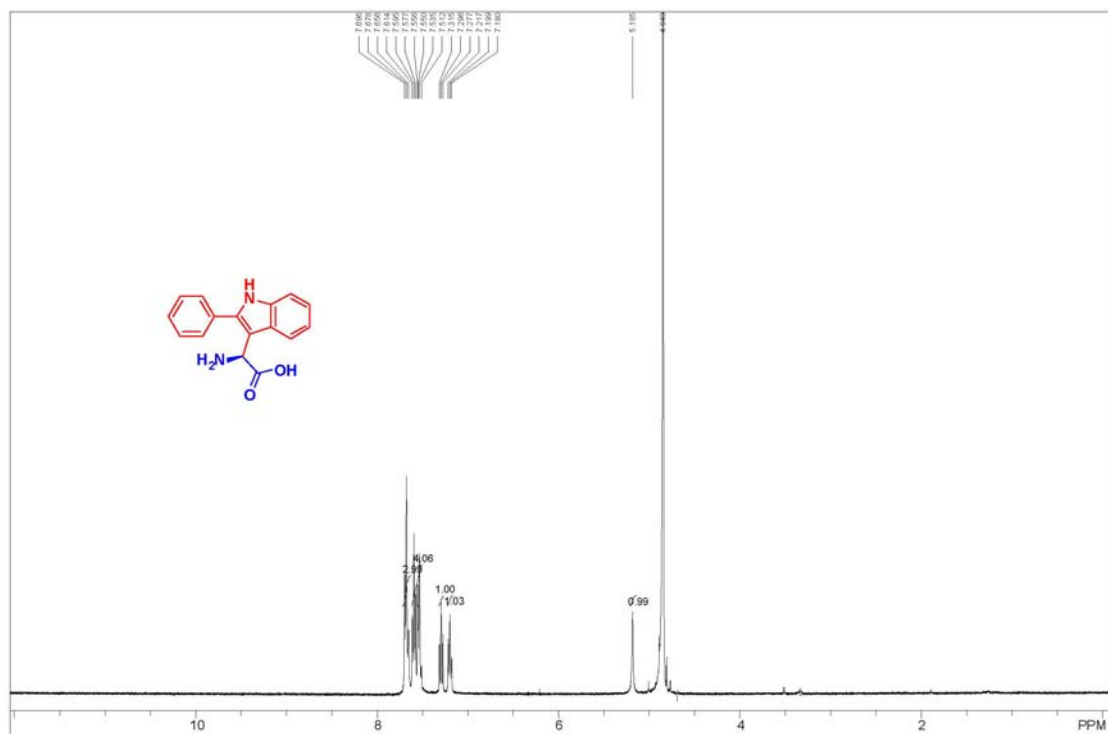

PP1-266 D20 BB+DEPT135

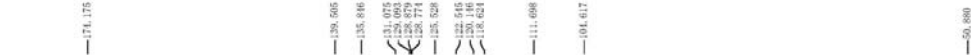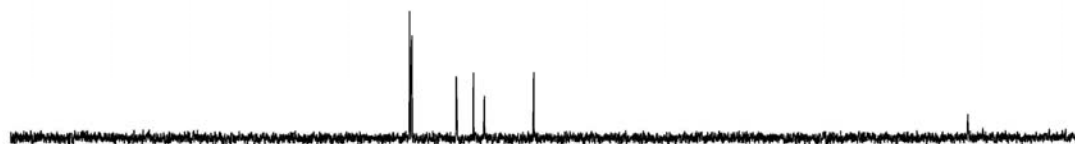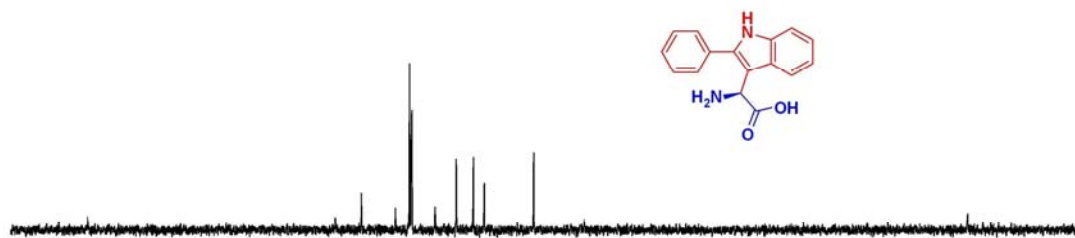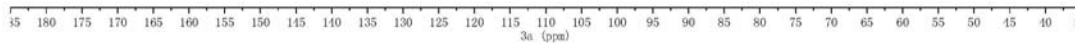

## (H) Reference

- 1 J. Wang, S. B. Zhou, D. Z. Lin, X. Ding, H. L. Jiang and H. Liu, *Chem. Commun.*, 2011, **47**, 8355
